# Supplementary material for: DNA Barcoding Unveils New Species of the Sexually Dimorphic Genus Anteon Jurine (Hymenoptera, Dryinidae) from China
Source: MDPI journal article supplement (doi:10.3390/insects15010018), 2023-12-30
Supplement: s1 [file s1]

# DNA Barcoding Unveils New Species of the Sexually Dimorphic Genus *Anteon* Jurine (Hymenoptera, Dryinidae) from China

Huayan Chen <sup>1,\*</sup>, Massimo Olmi <sup>2</sup>, Frode Ødegaard <sup>3</sup>, Leonardo Capradossi <sup>4</sup> and Jingxian Liu <sup>5</sup>

<sup>1</sup> Key Laboratory of Plant Resources Conservation and Sustainable Utilization, South China Botanical Garden, Chinese Academy of Sciences, Guangzhou 510650, China

<sup>2</sup> Tropical Entomology Research Center, Via De Gasperi 10, 01100 Viterbo, Italy; olmi@unitus.it

<sup>3</sup> Department of Natural History, Norwegian University of Science and Technology (NTNU), NO-7491 Trondheim, Norway; frode.odegaard@ntnu.no

<sup>4</sup> Independent Researcher, 01017 Tuscania, Italy; leonardocapradossi.lc@gmail.com

<sup>5</sup> Department of Entomology, South China Agricultural University, Guangzhou 510642, China; liujingxian@scau.edu.cn

\* Correspondence: huayanc@scbg.ac.cn

Supplement material

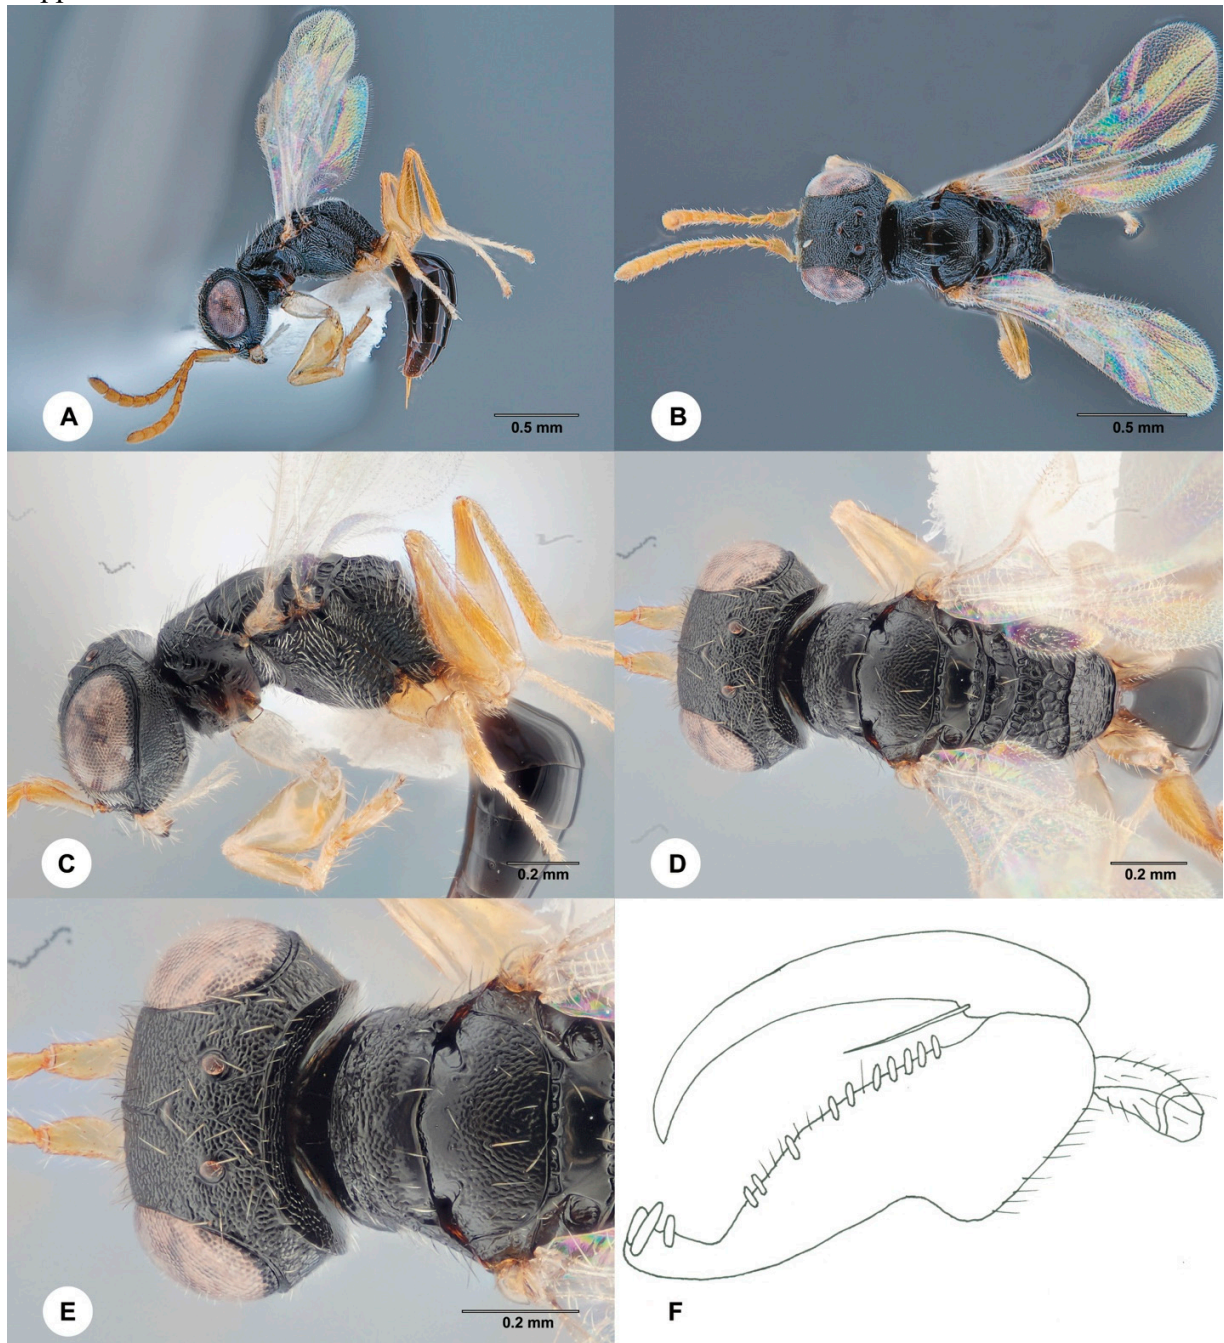

**Figure S1.** *Anteon abdunnouri* Olmi, 1987, female (SCAU 3040430) (A) Habitus, lateral view (B) Habitus, dorsal view (C) Head and mesosoma, lateral view (D) Head and mesosoma, dorsal view (E) Head and anterior mesosoma, dorsal view (F) Chela

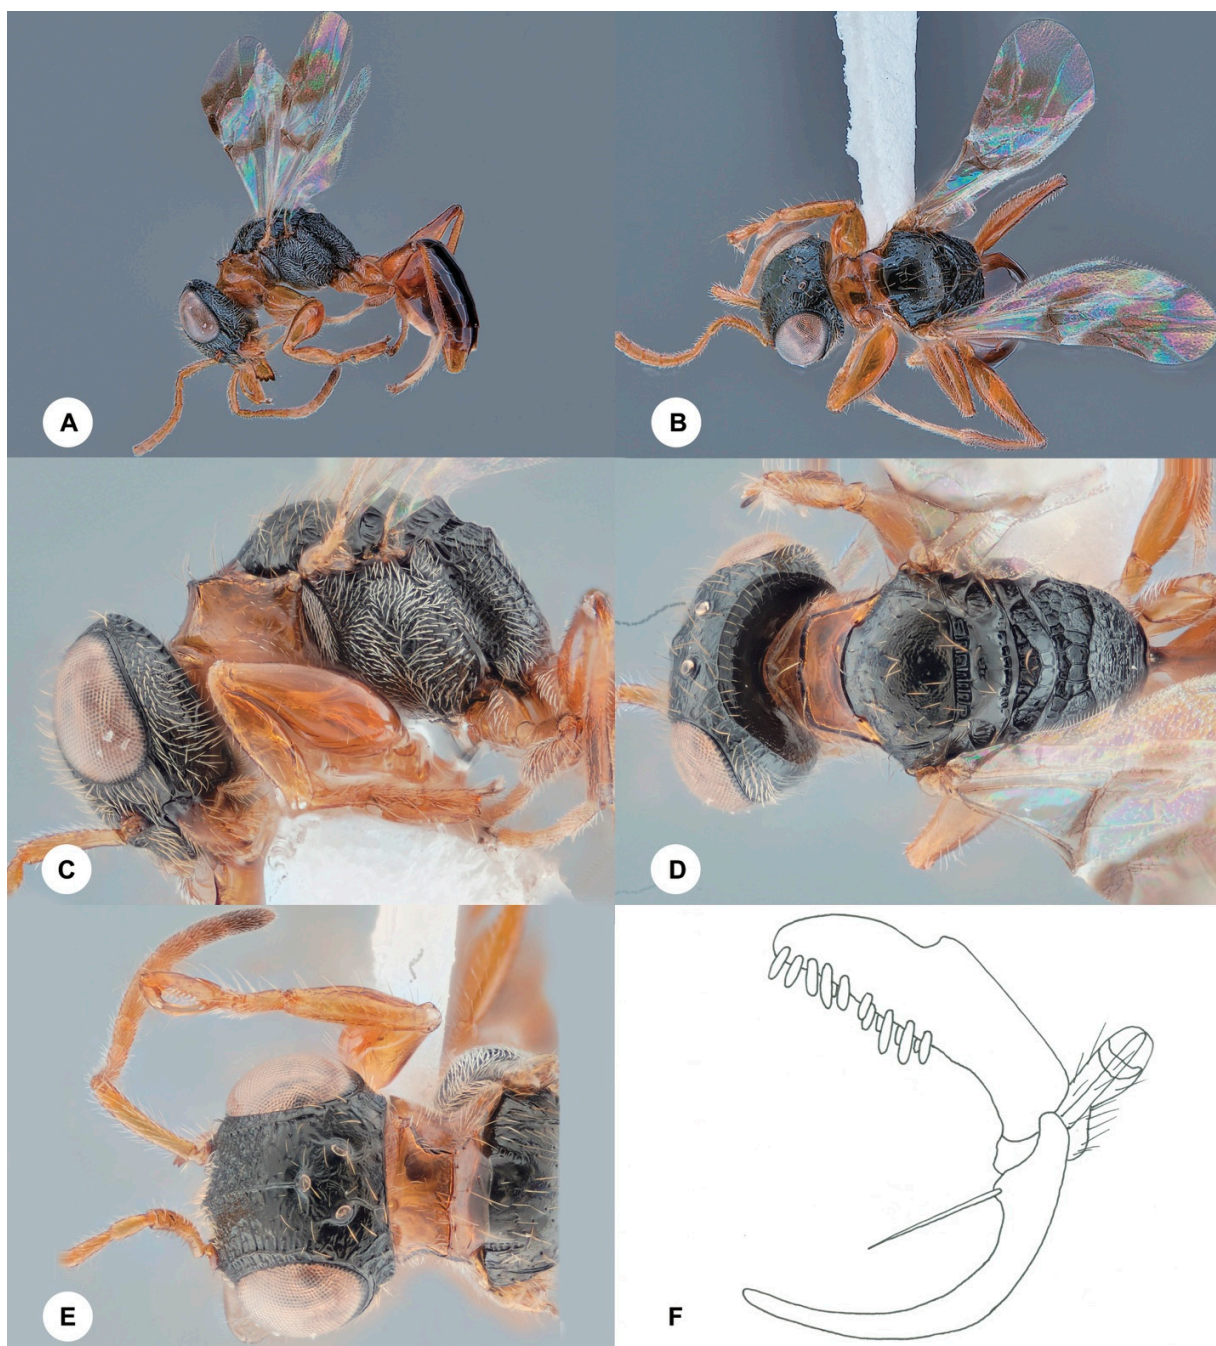

**Figure S2.** *Anteon achterbergi* Olmi, 1991, female (SCAU 3011714) (A) Habitus, lateral view (B) Habitus, dorsal view (C) Head and mesosoma, lateral view (D) Head and mesosoma, dorsal view (E) Head and anterior mesosoma, dorsal view (F) Chela



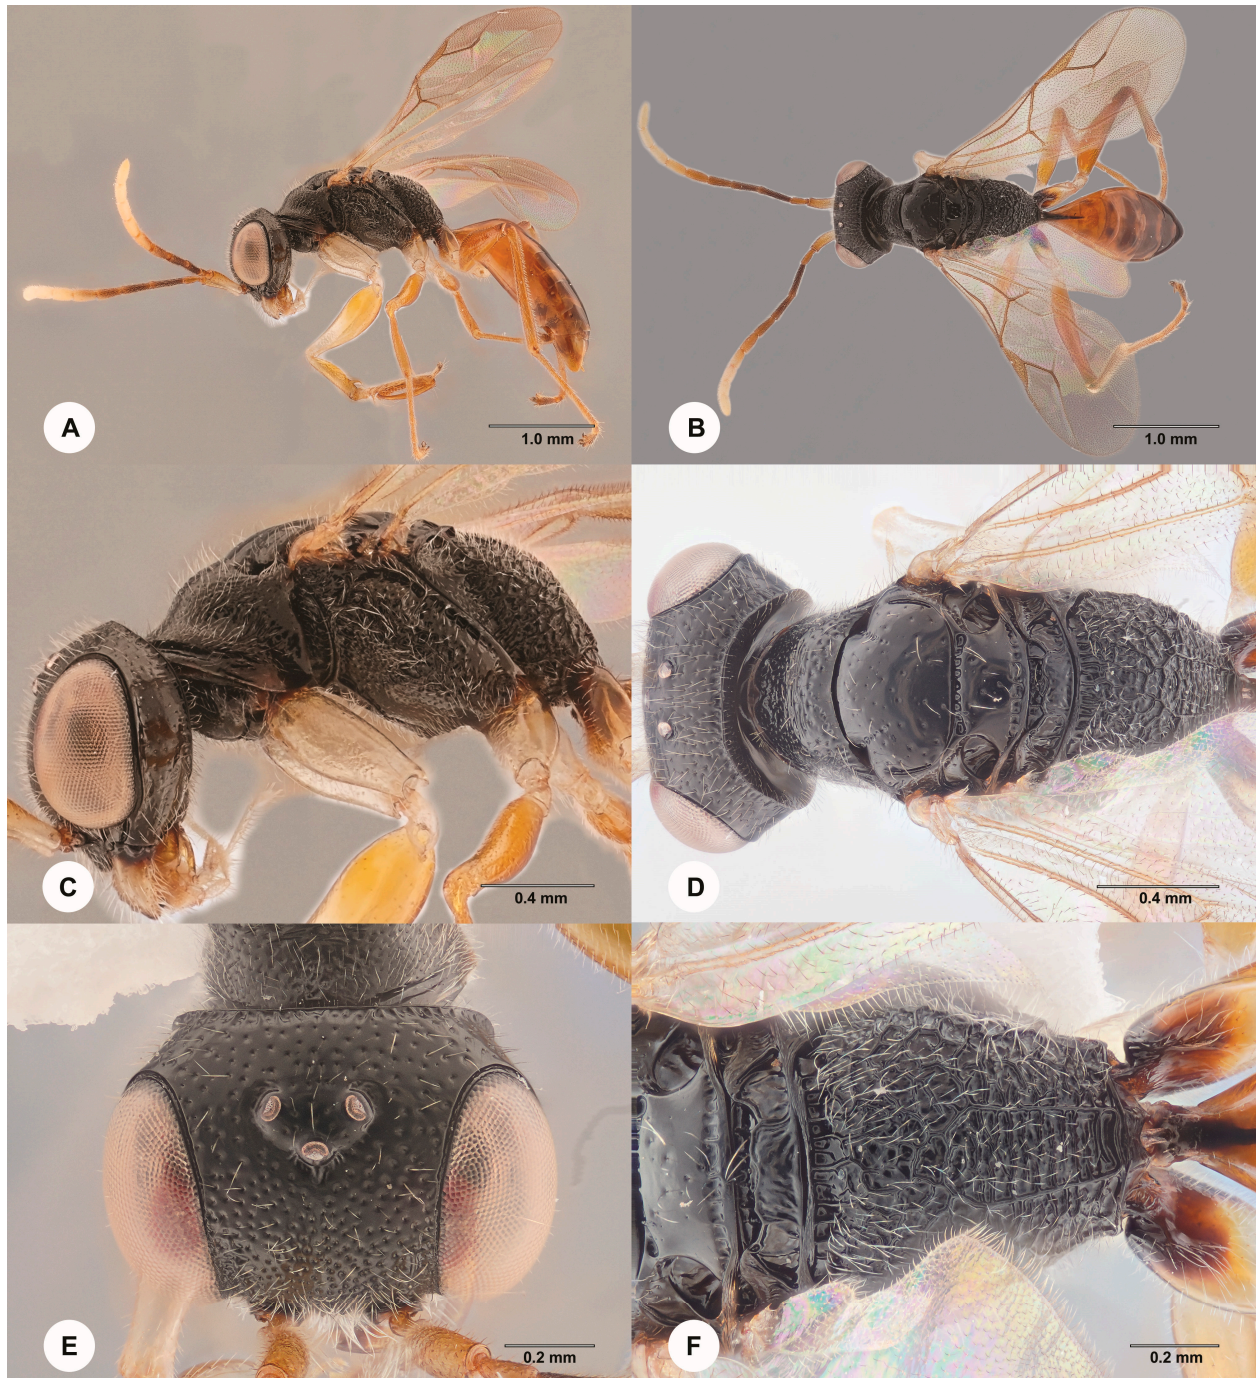

**Figure S3.** *Anteon blanduscutum* Xu, He & Rui, 1996, female (SCAU 3011677) (A) Habitus, lateral view (B) Habitus, dorsal view (C) Head and mesosoma, lateral view (D) Head and mesosoma, dorsal view (E) Head, dorsal view (F) Propodeum, dorsal view.



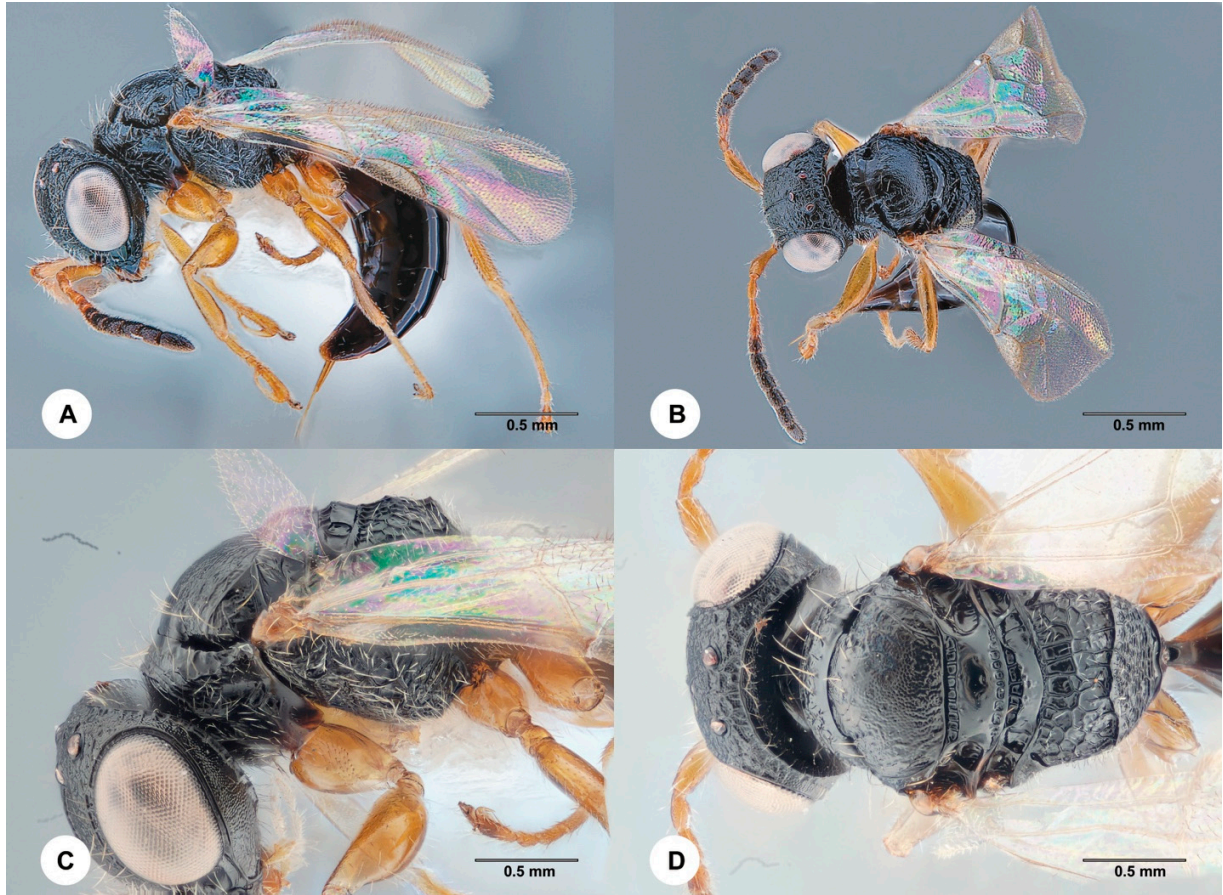

**Figure S4.** *Anteon borneanum* Olmi, 1984, female (SCAU 3011669) (A) Habitus, lateral view (B) Habitus, dorsal view (C) Head and mesosoma, lateral view (D) Head and mesosoma, dorsal view

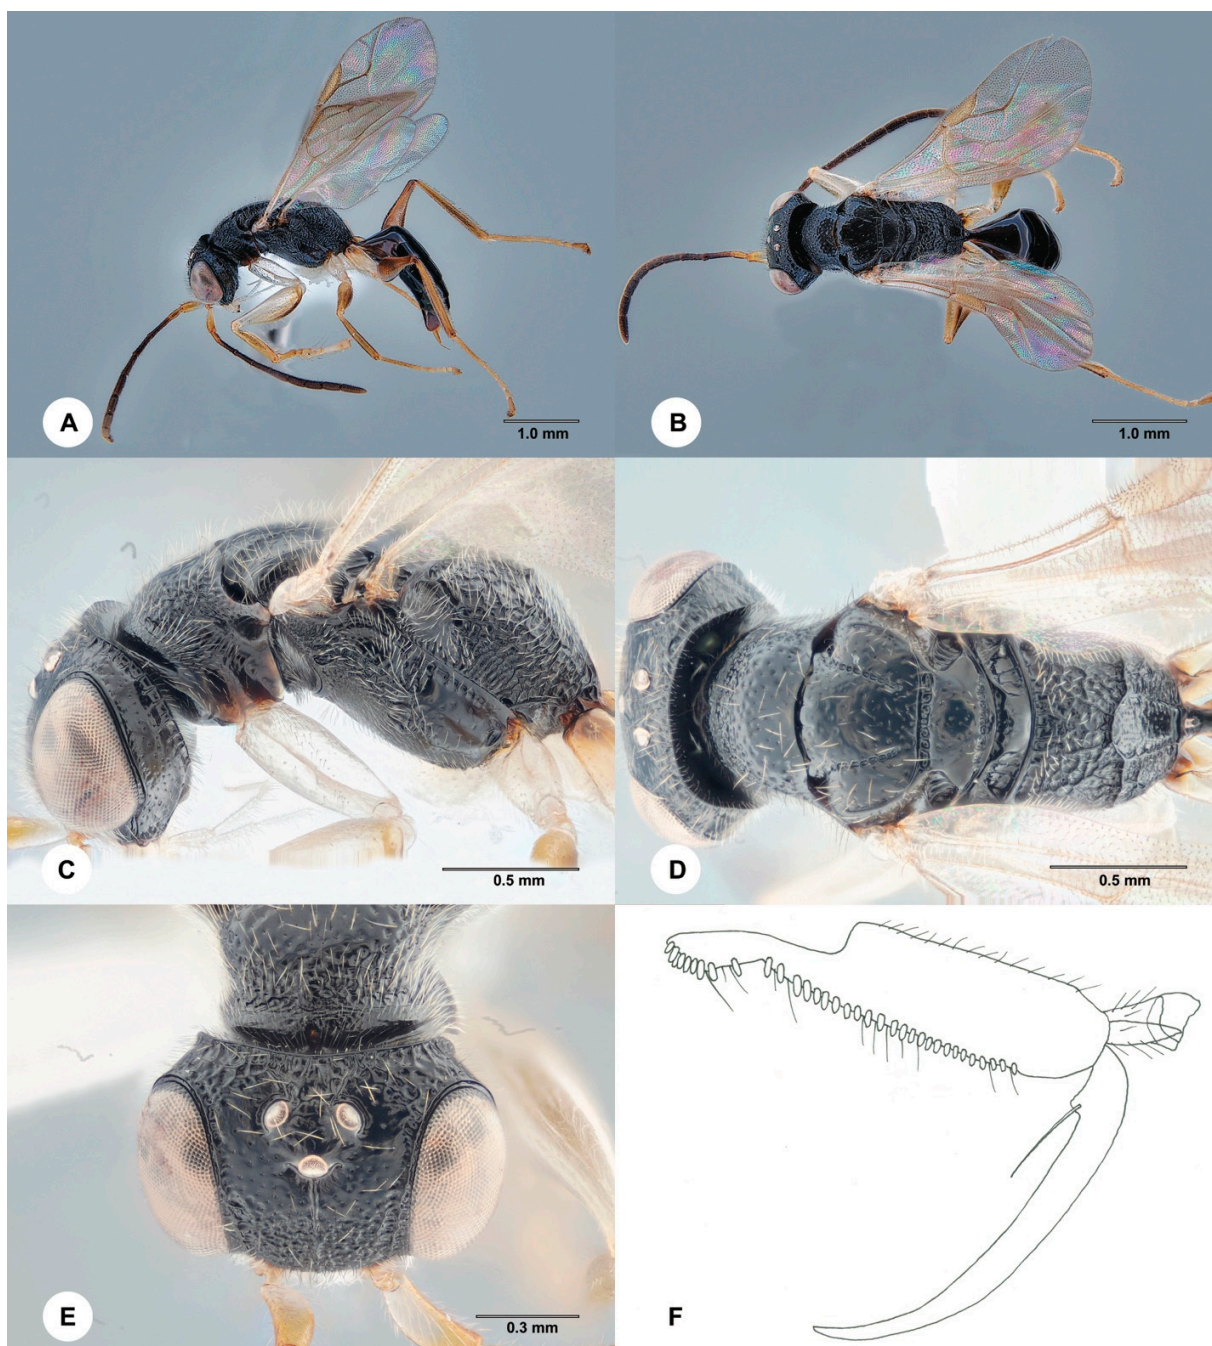

**Figure S5.** *Anteon confusum* Olmi, 1991, female (SCAU 3040517) (A) Habitus, lateral view (B) Habitus, dorsal view (C) Head and mesosoma, lateral view (D) Head and mesosoma, dorsal view (E) Head and anterior mesosoma, dorsal view (F) Chela



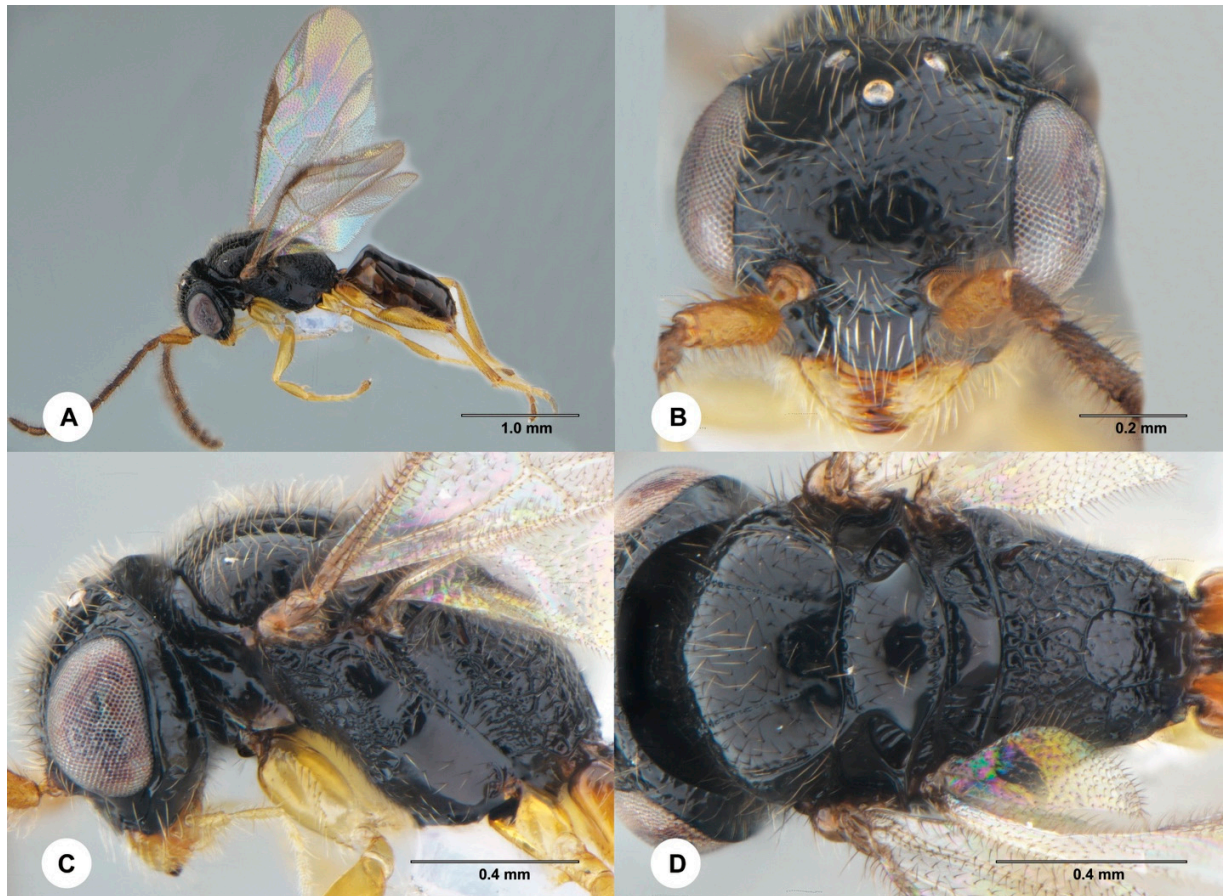

**Figure S6.** *Anteon confusum* Olmi, 1991, male (SCAU 3044058) (A) Habitus, lateral view (B) Habitus, dorsal view (C) Head and mesosoma, lateral view (D) Head and mesosoma, dorsal view

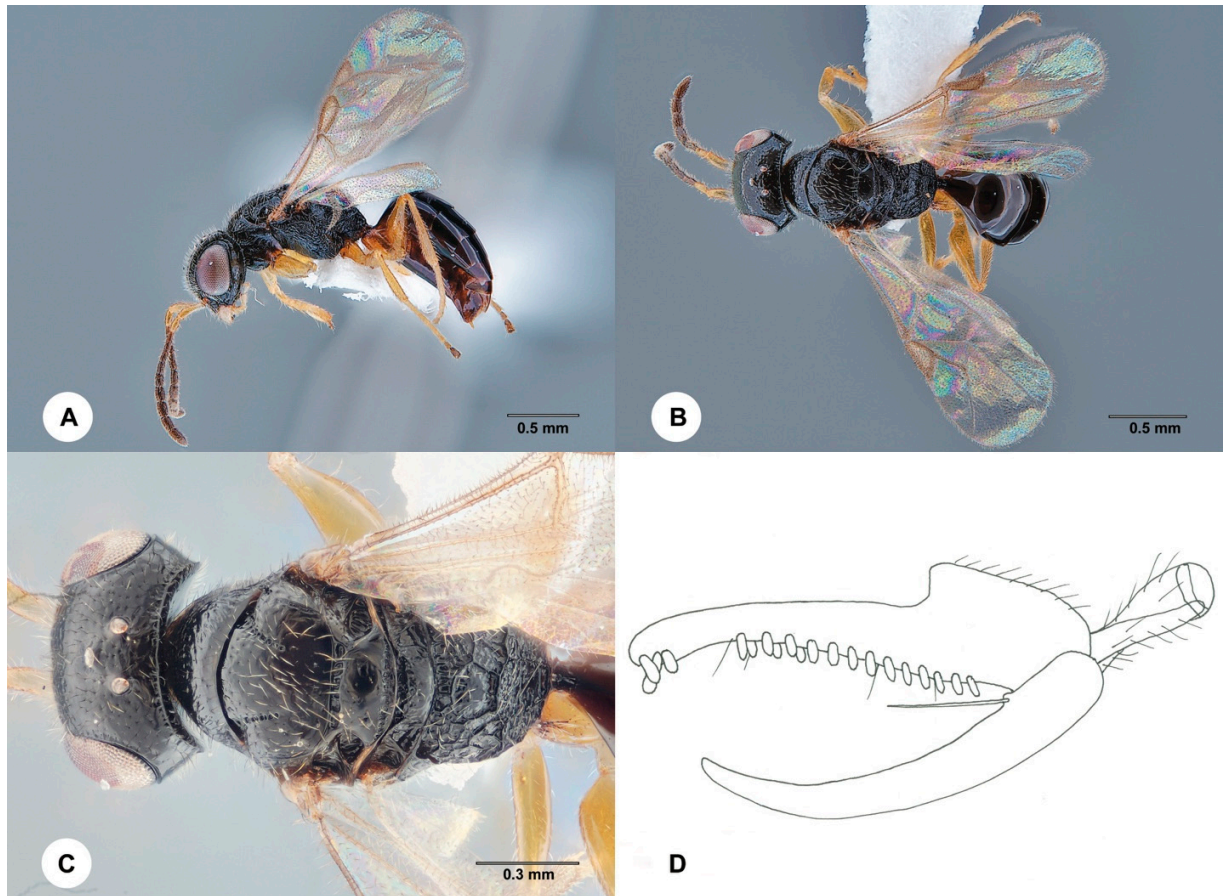

**Figure S7.** *Anteon exiguum* (Haupt, 1941), female (SCAU 3011621) **(A)** Habitus, lateral view **(B)** Habitus, dorsal view **(C)** Head and mesosoma, lateral view **(D)** Head and mesosoma, dorsal view **(E)** Head and anterior mesosoma, dorsal view **(F)** Chela



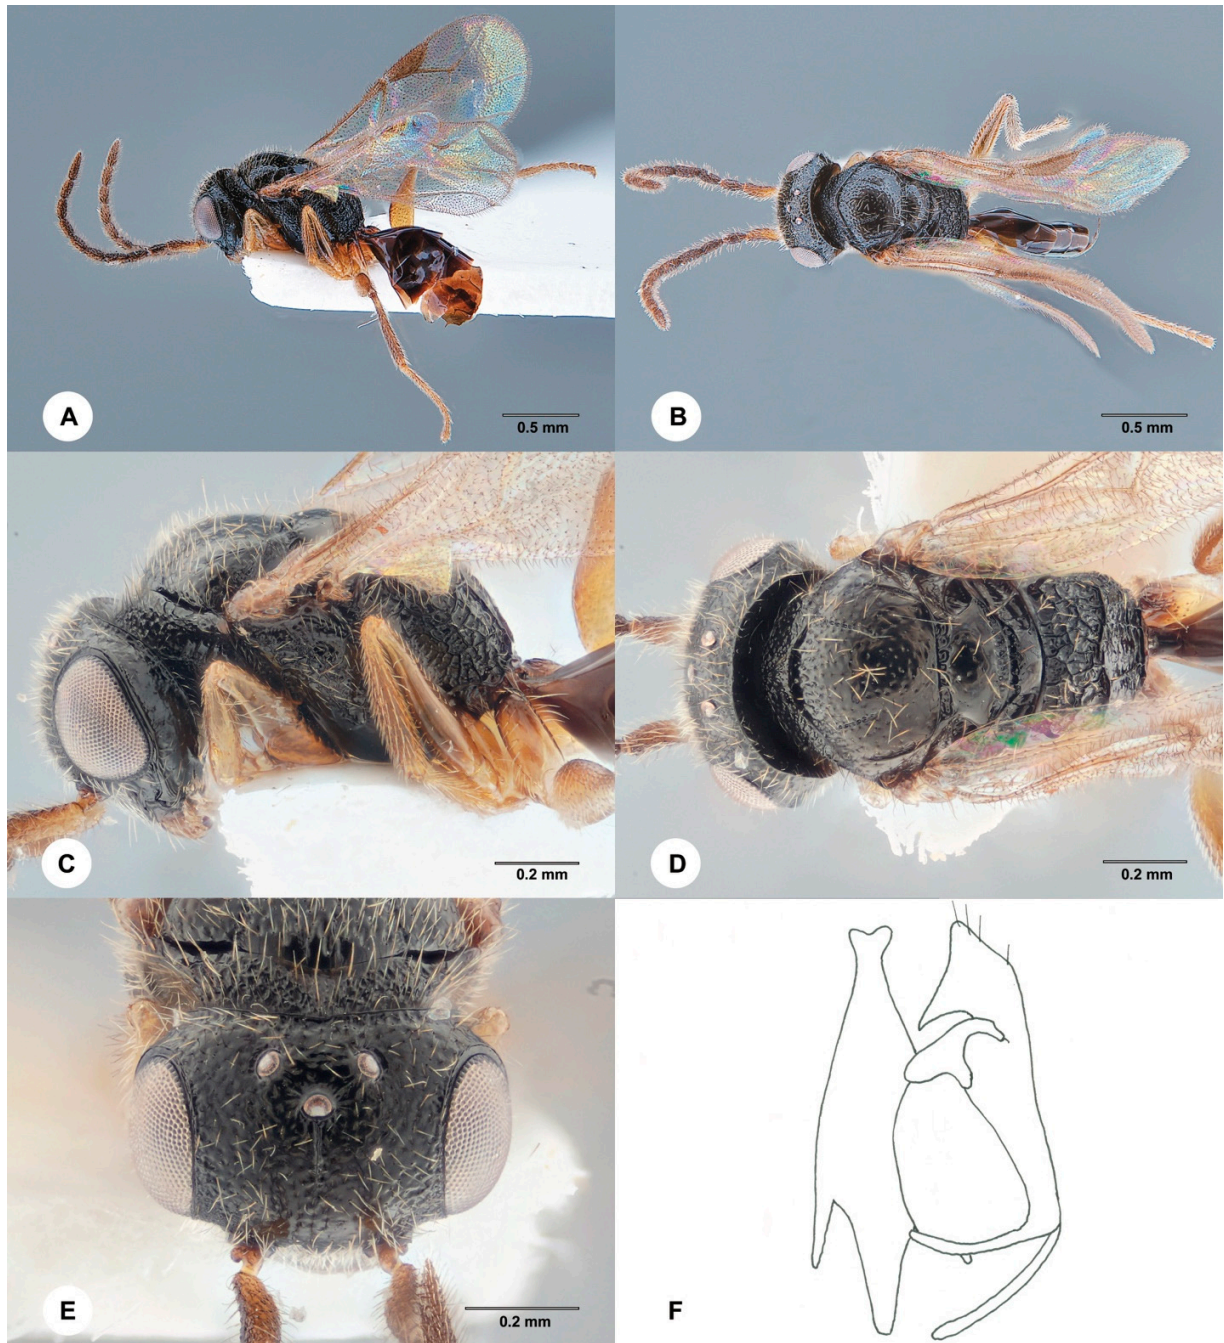

**Figure S8.** *Anteon fidum* Olmi, 1991, male (SCAU 3040512) (A) Habitus, lateral view (B) Habitus, dorsal view (C) Head and mesosoma, lateral view (D) Head and mesosoma, dorsal view (E) Head, dorsal view (F) Genitalia (left half removed)

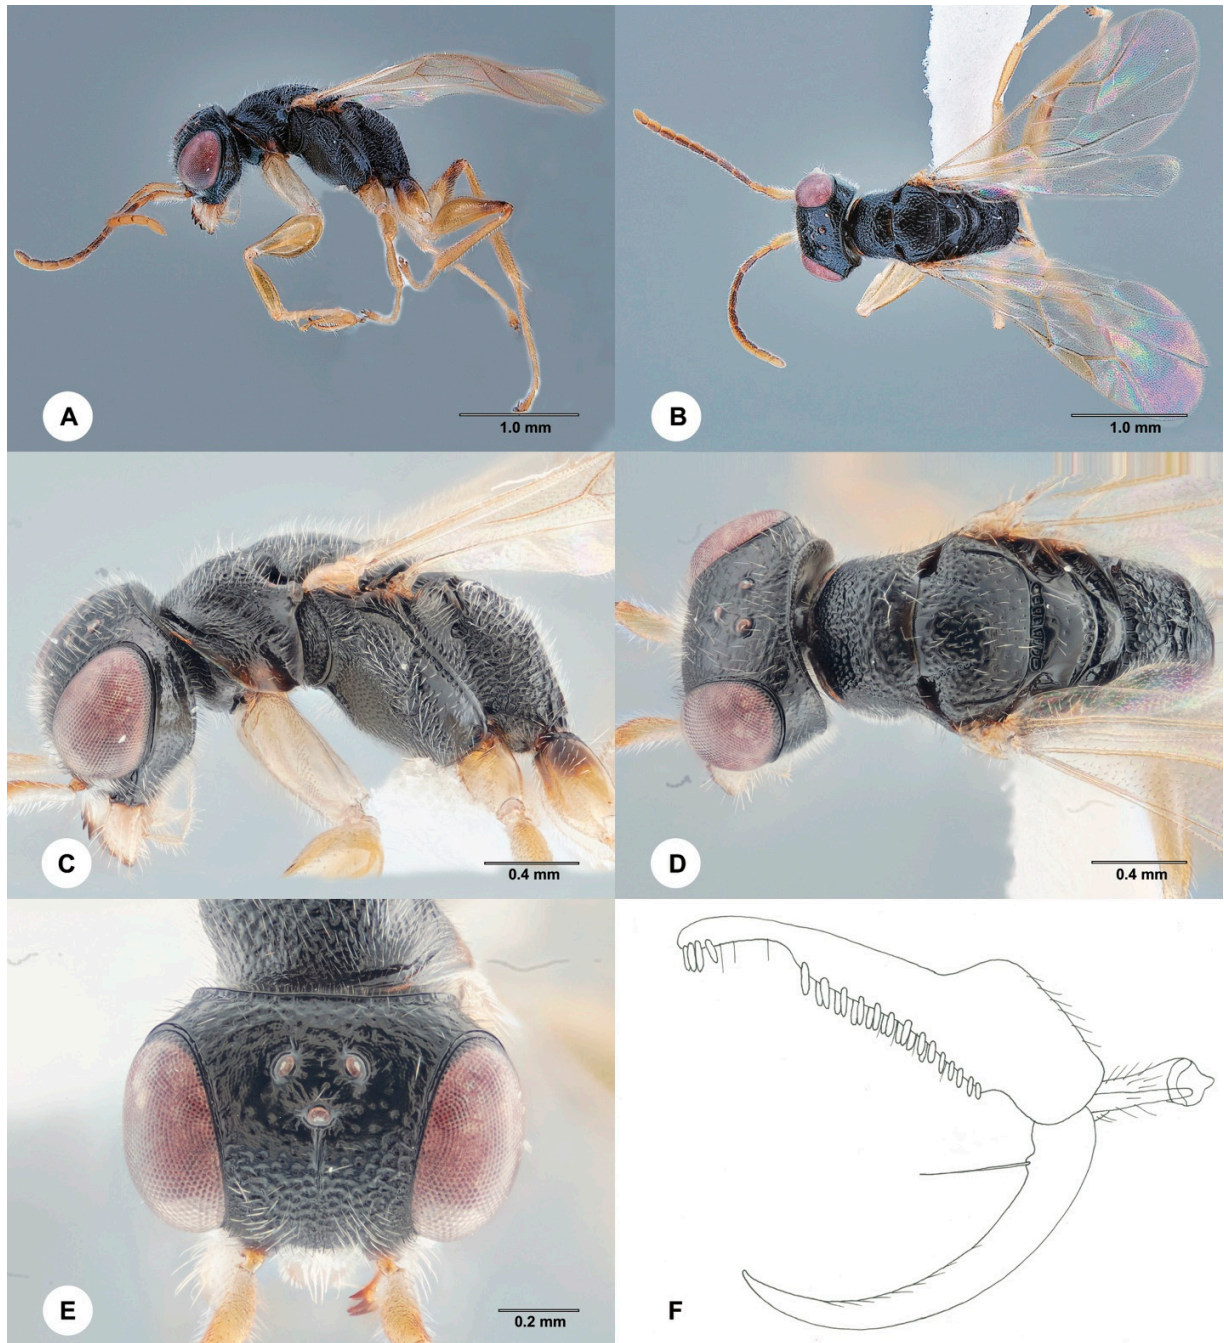

**Figure S9.** *Anteon funiuense* Xu, He & Olmi, 2001, female (SCAU 3040522) (A) Habitus, lateral view (B) Habitus, dorsal view (C) Head and mesosoma, lateral view (D) Head and mesosoma, dorsal view (E) Head, dorsal view (F) Chela.



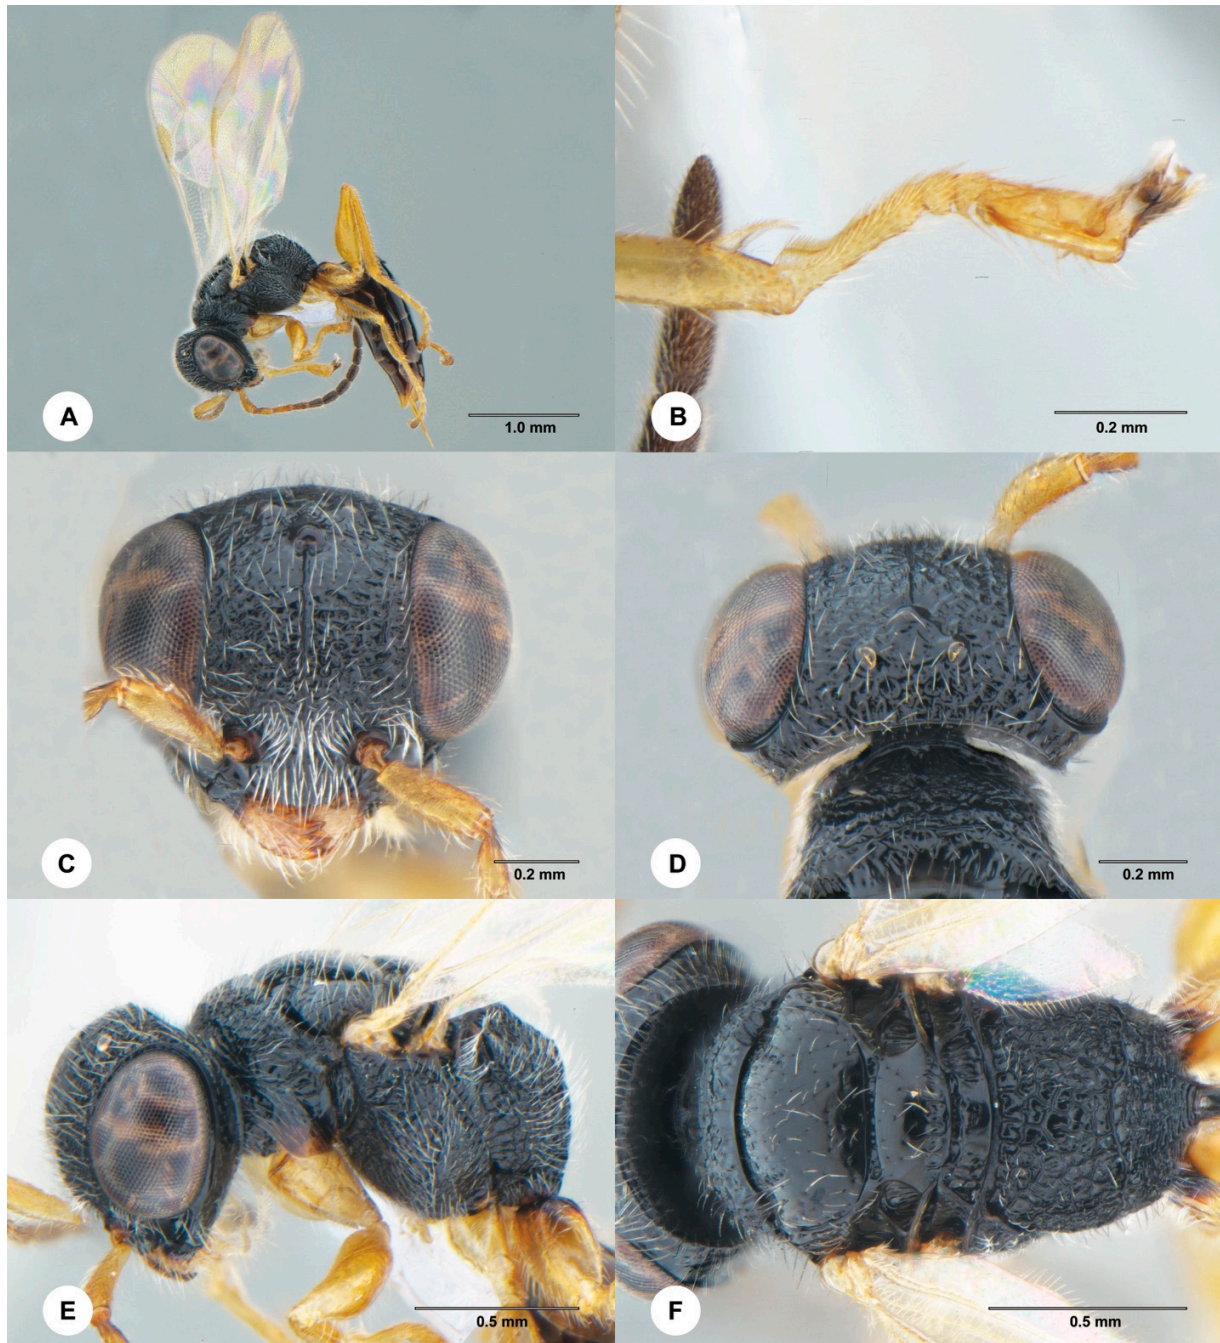

**Figure S10.** *Anteon henanense* Xu, He & Olmi, 2001, female (SCAU 3044072) (A) Habitus, lateral view (B) Chela (C) Head, anterior view (D) Head, dorsal view (E) Mesosoma, lateral view (F) Mesosoma, dorsal view.



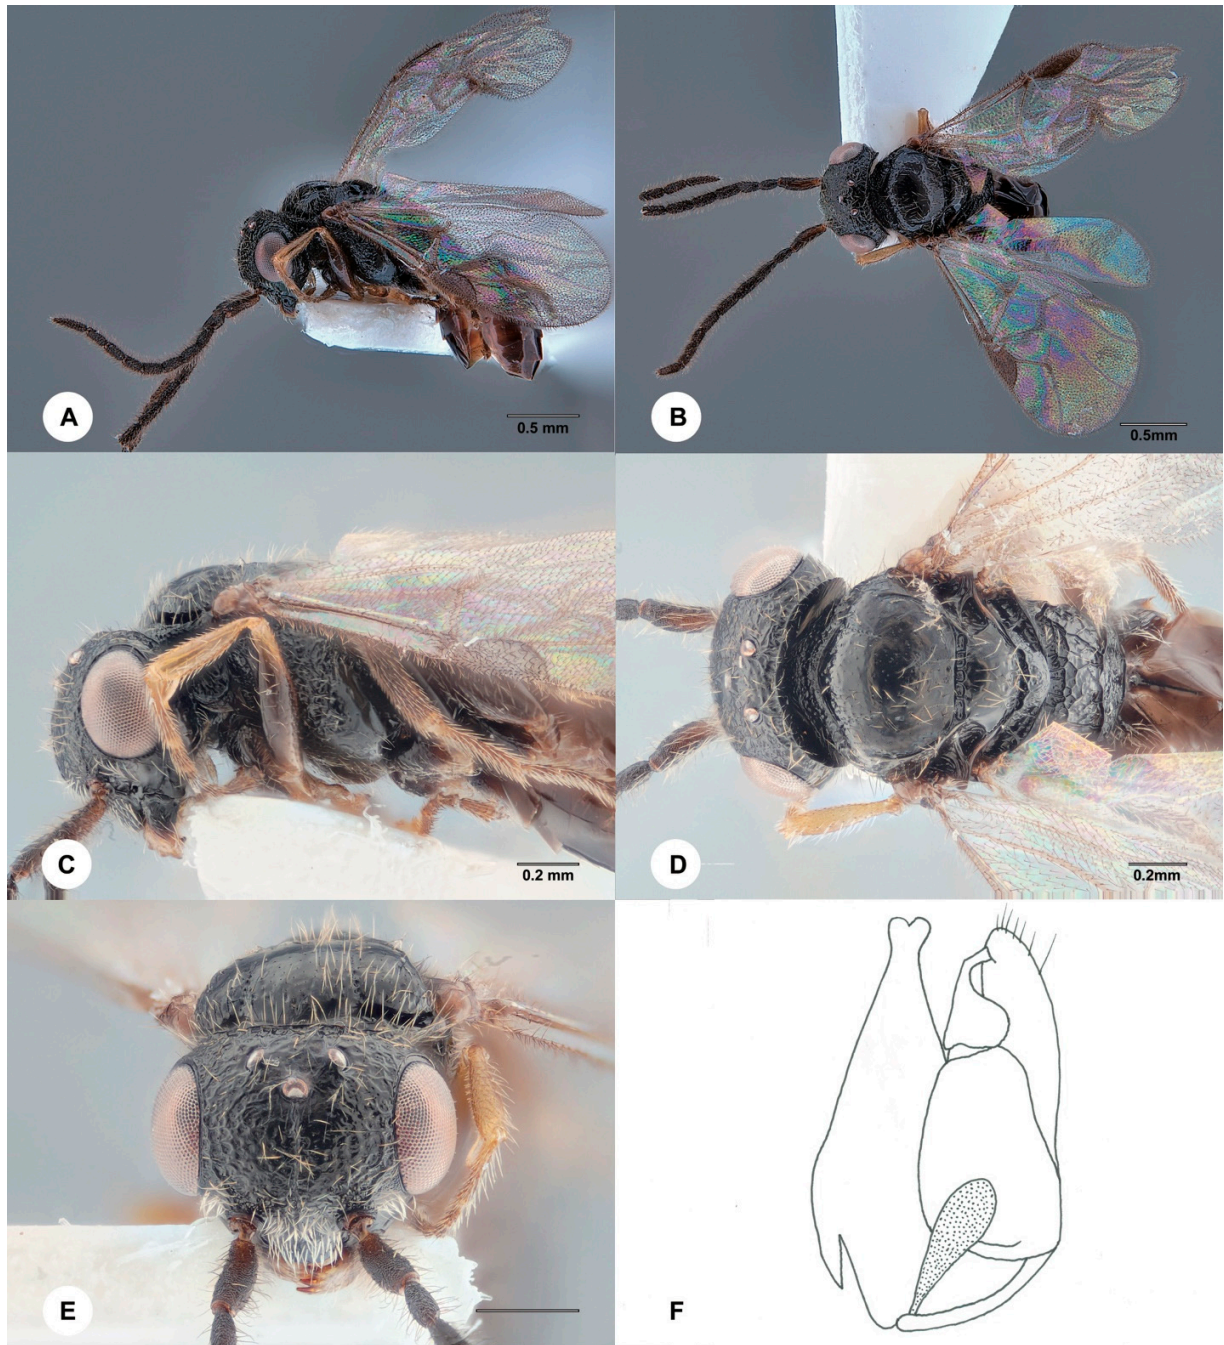

**Figure S11.** *Anteon henanense* Xu, He & Olmi, 2001, male (SCAU 3040511) (A) Habitus, lateral view (B) Habitus, dorsal view (C) Head and mesosoma, lateral view (D) Head and mesosoma, dorsal view (E) Head, anterior view (F) Genitalia (left half removed)



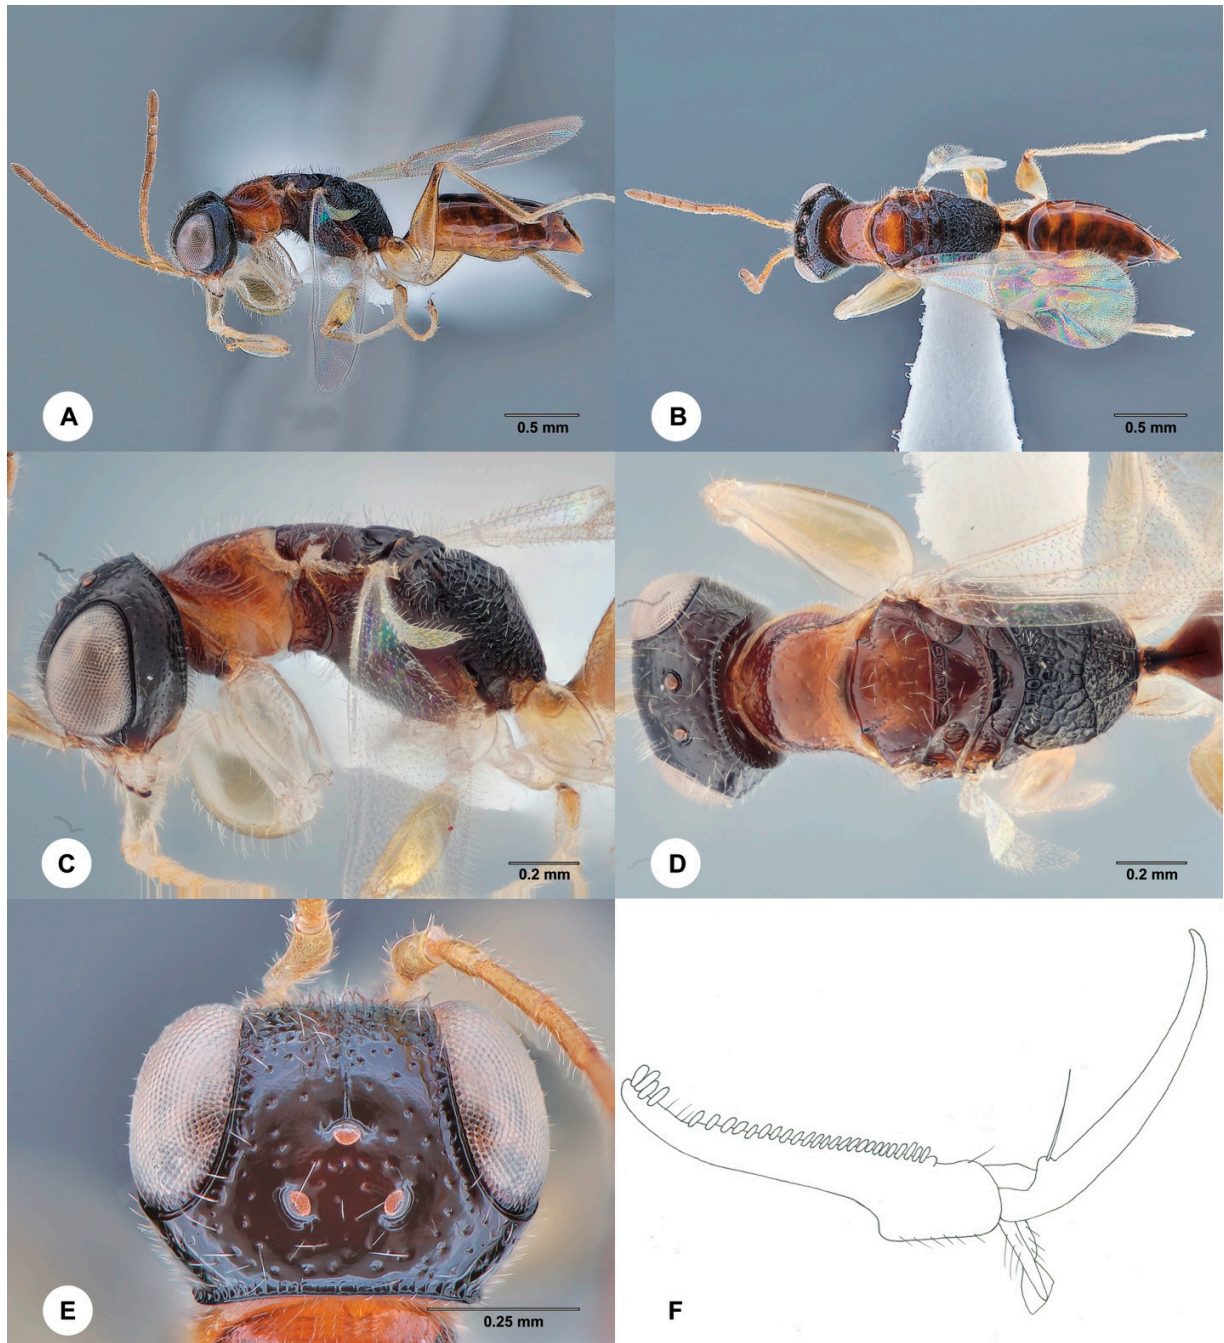

**Figure S12.** *Anteon hilare* Olmi, 1984, female (SCAU 3011713) (A) Habitus, lateral view (B) Habitus, dorsal view (C) Head and mesosoma, lateral view (D) Head and mesosoma, dorsal view (E) Head, dorsal view (F) Chela.



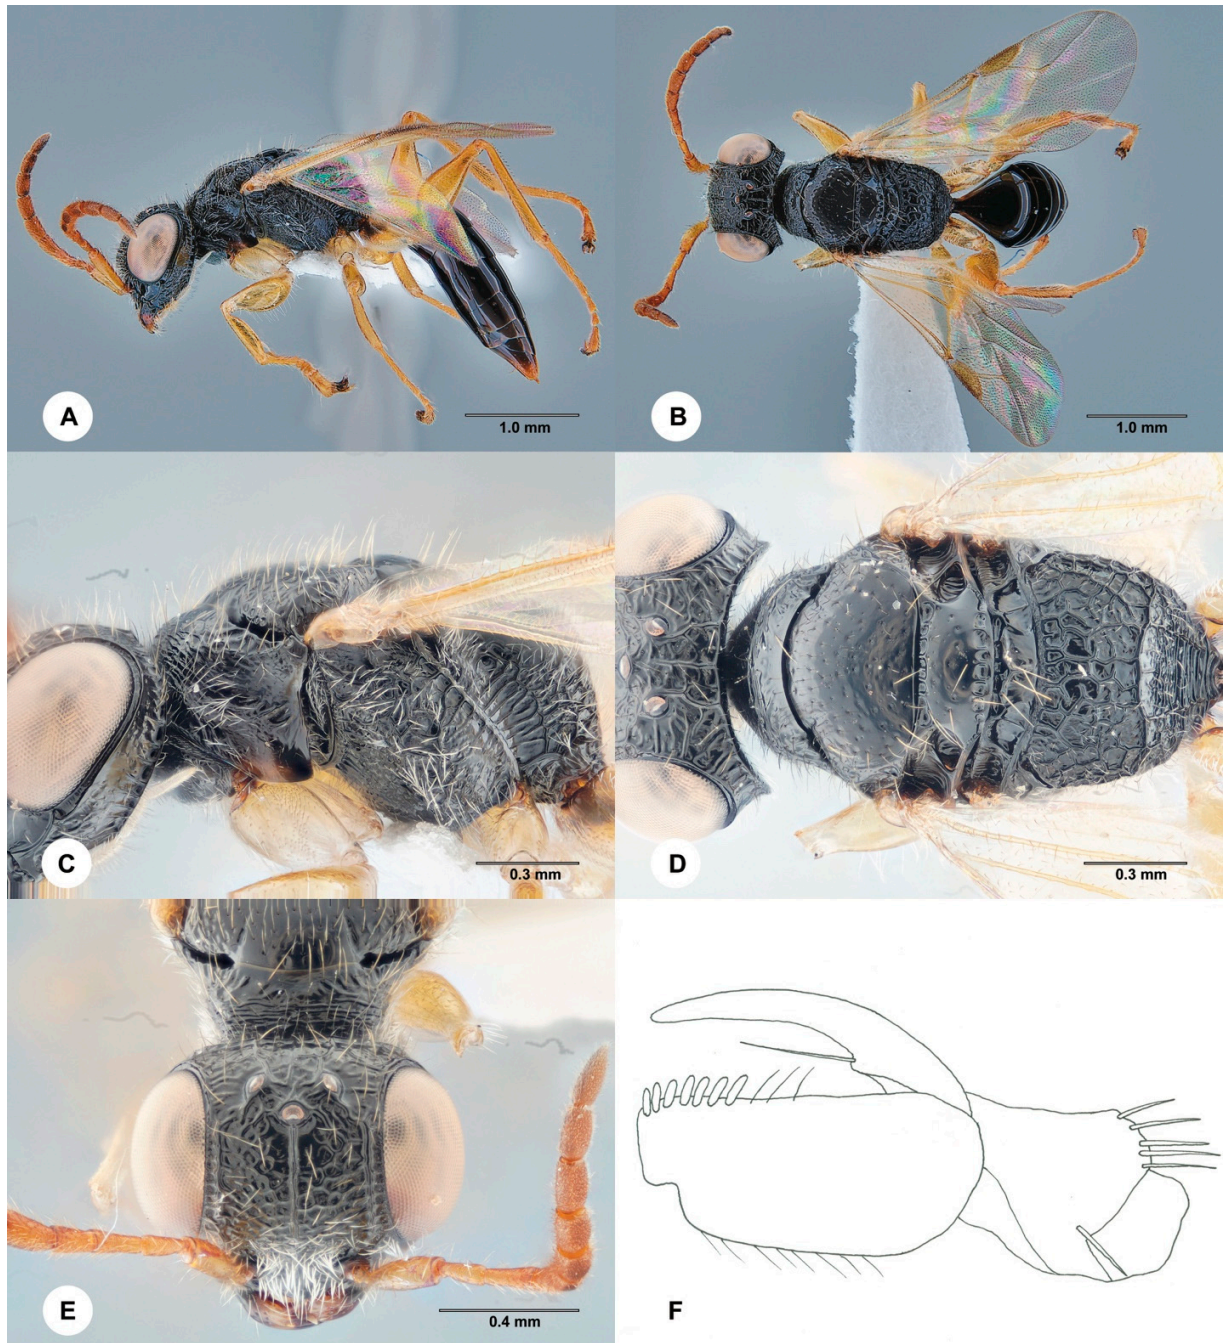

**Figure S13.** *Anteon hirashimai* Olmi, 1993, female (SCAU 3011676) (A) Habitus, lateral view (B) Habitus, dorsal view (C) Head and mesosoma, lateral view (D) Head and mesosoma, dorsal view (E) Head, dorsal view (F) Chela.



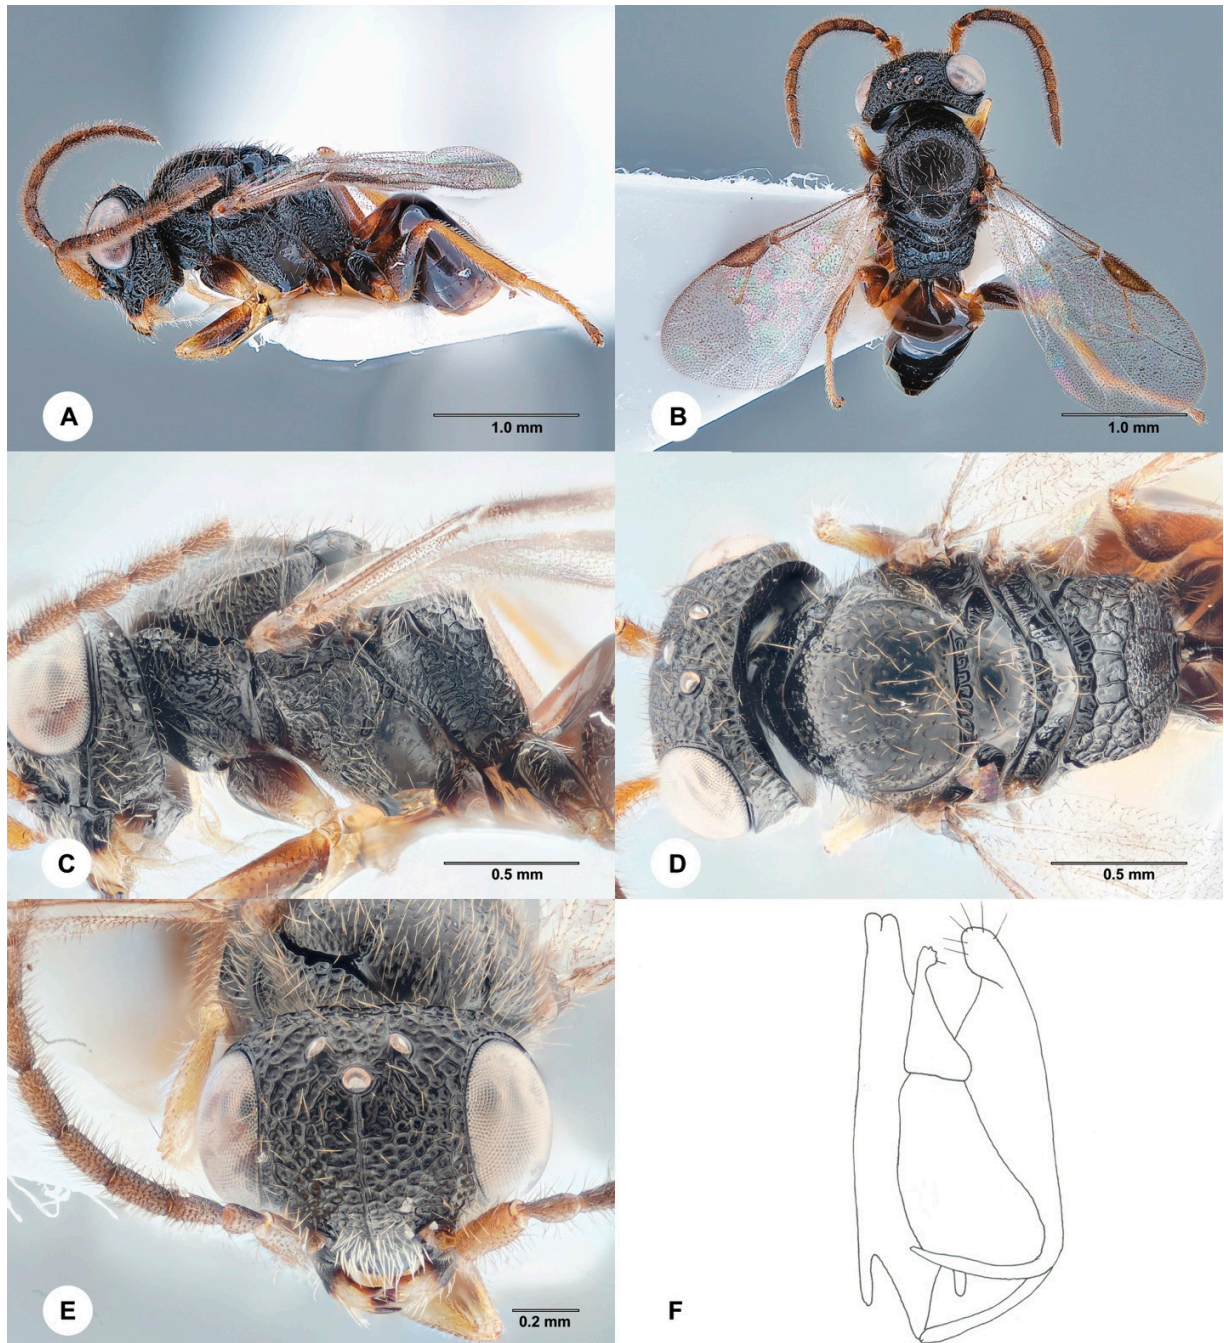

**Figure S14.** *Anteon mite* Olmi, 1996, male (SCAU 3040515) (A) Habitus, lateral view (B) Habitus, dorsal view (C) Head and mesosoma, lateral view (D) Head and mesosoma, dorsal view (E) Head, anterior view (F) Genitalia (left half removed).



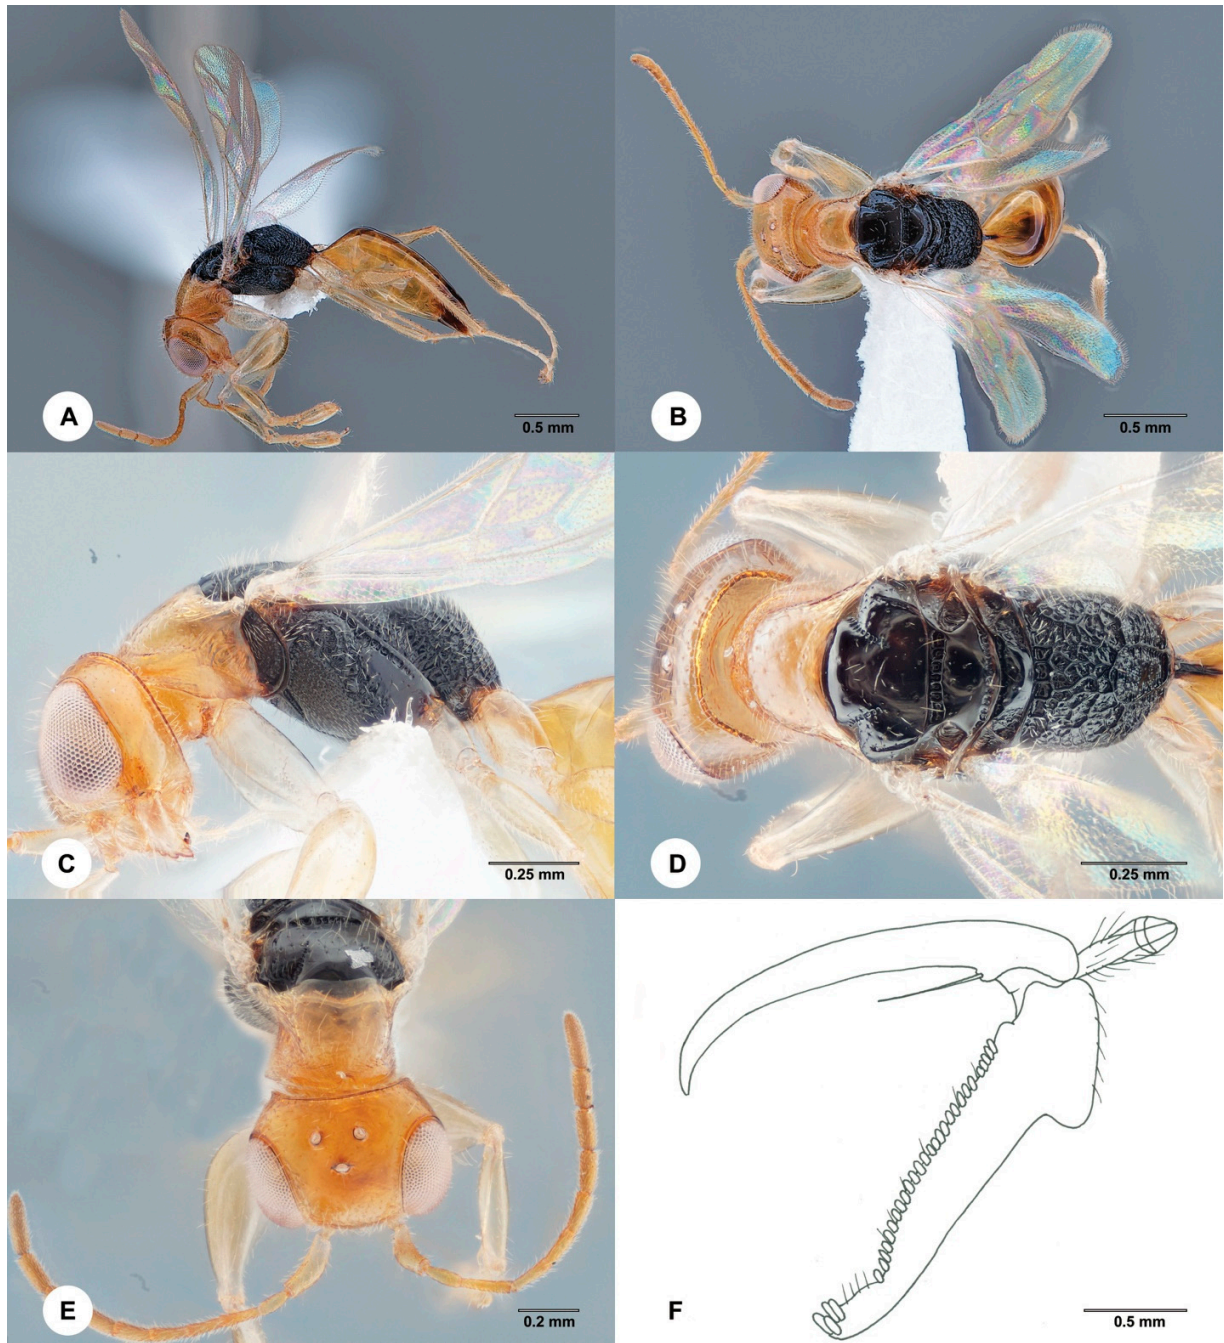

**Figure S15.** *Anteon multicolor* Xu, He & Olmi, 1998, female (SCAU 3011661) (A) Habitus, lateral view (B) Habitus, dorsal view (C) Head and mesosoma, lateral view (D) Head and mesosoma, dorsal view (E) Head, dorsal view (F) Chela.



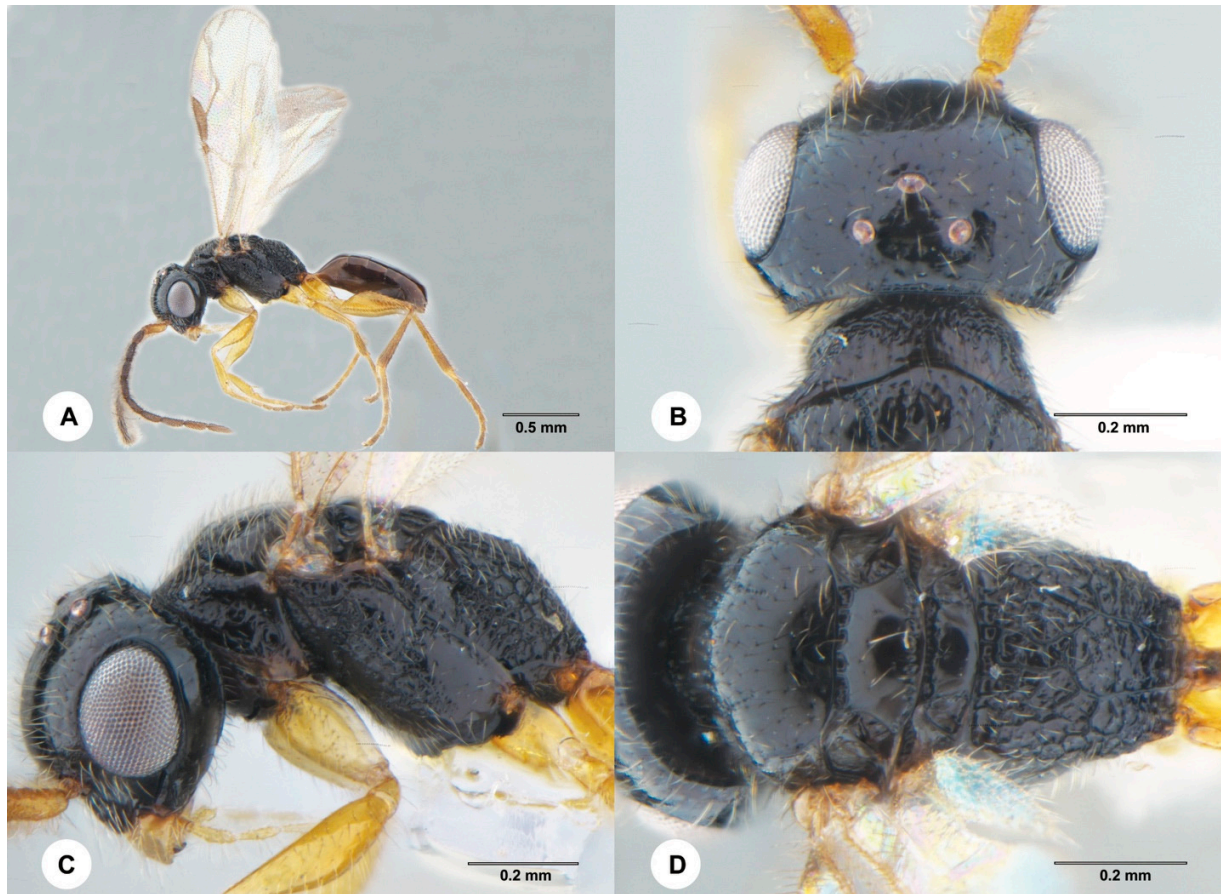

**Figure S16.** *Anteon multicolor* Xu, He & Olmi, 1998, male (SCAU 3044011) (A) Habitus, lateral view (B) Head, dorsal view (C) Head and mesosoma, lateral view (D) Head and mesosoma, dorsal view.

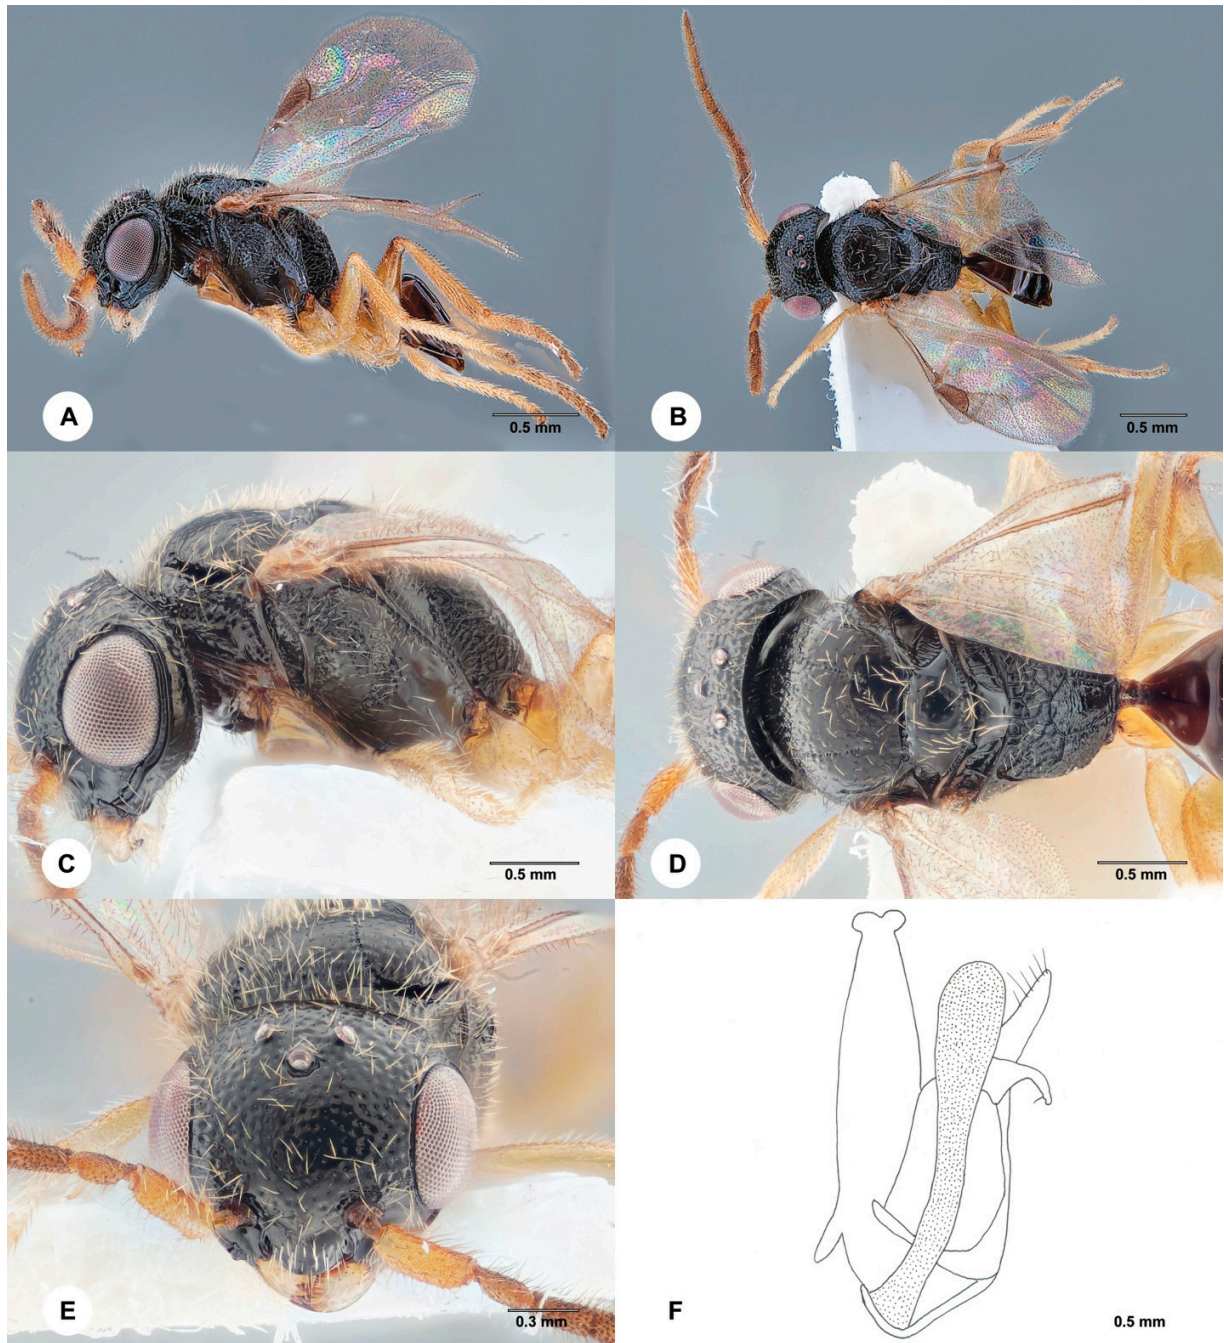

**Figure S17.** *Anteon munitum* Olmi, 1984, male (SCAU 3040524) (A) Habitus, lateral view (B) Habitus, dorsal view (C) Head and mesosoma, lateral view (D) Head and mesosoma, dorsal view (E) Head, anterior view (F) Genitalia (left half removed).



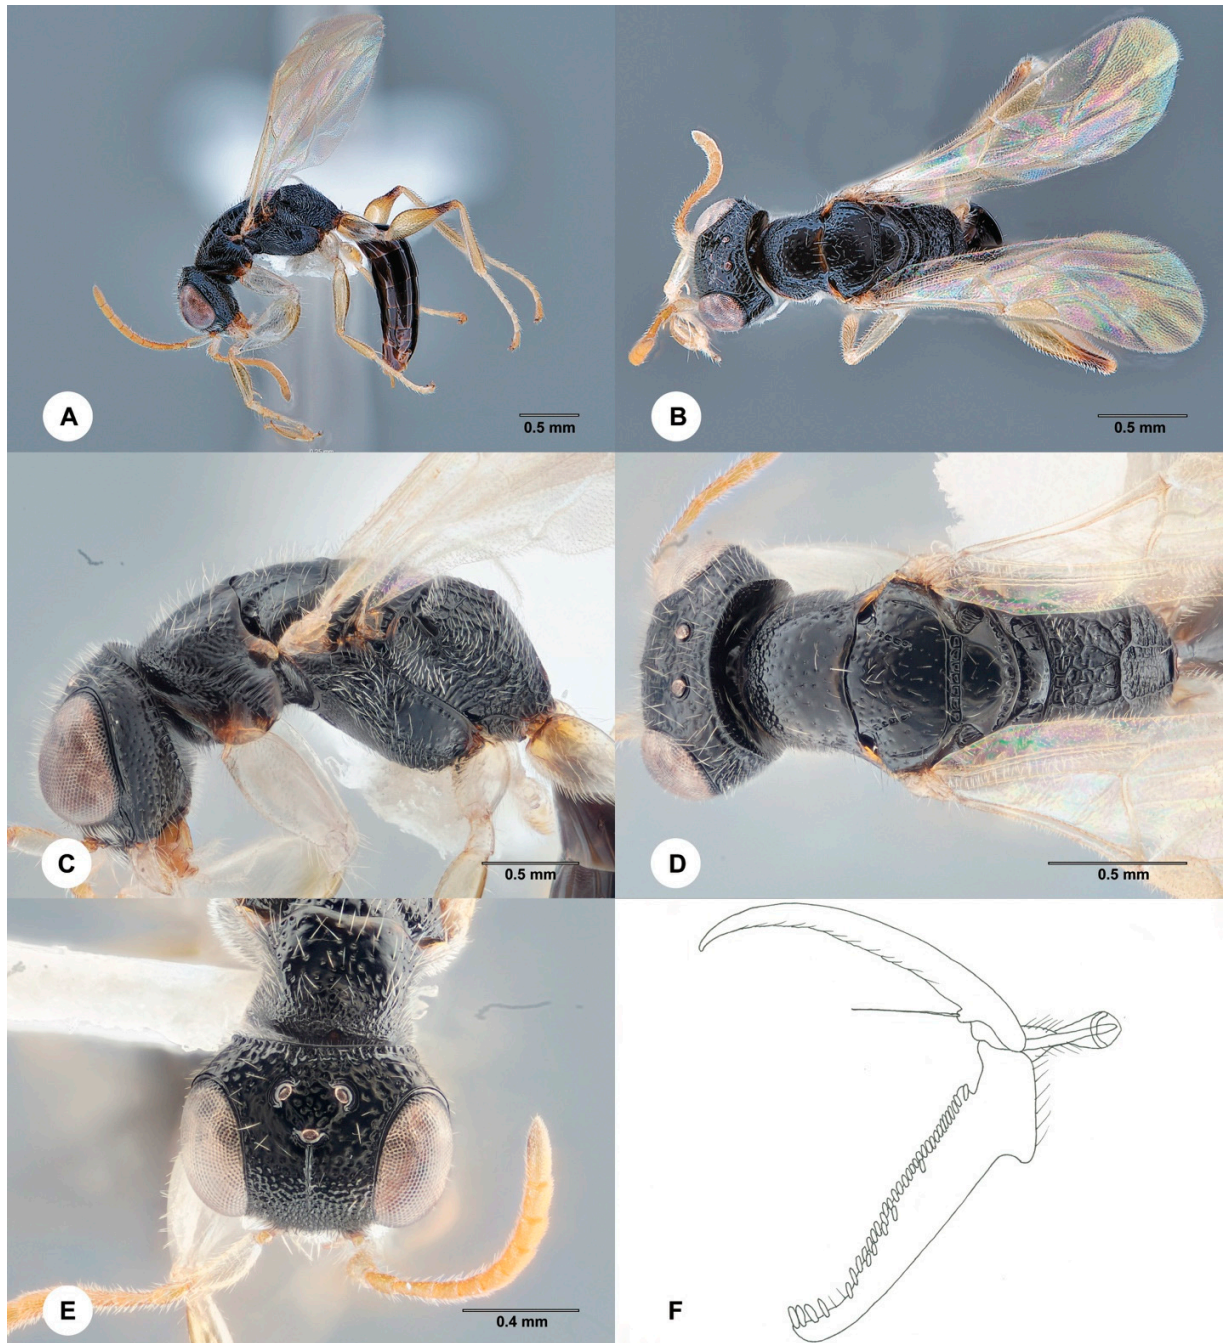

**Figure S18.** *Anteon naduense* Olmi 1987, female (SCAU 3040521) (A) Habitus, lateral view (B) Habitus, dorsal view (C) Head and mesosoma, lateral view (D) Head and mesosoma, dorsal view (E) Head, dorsal view (F) Chela.

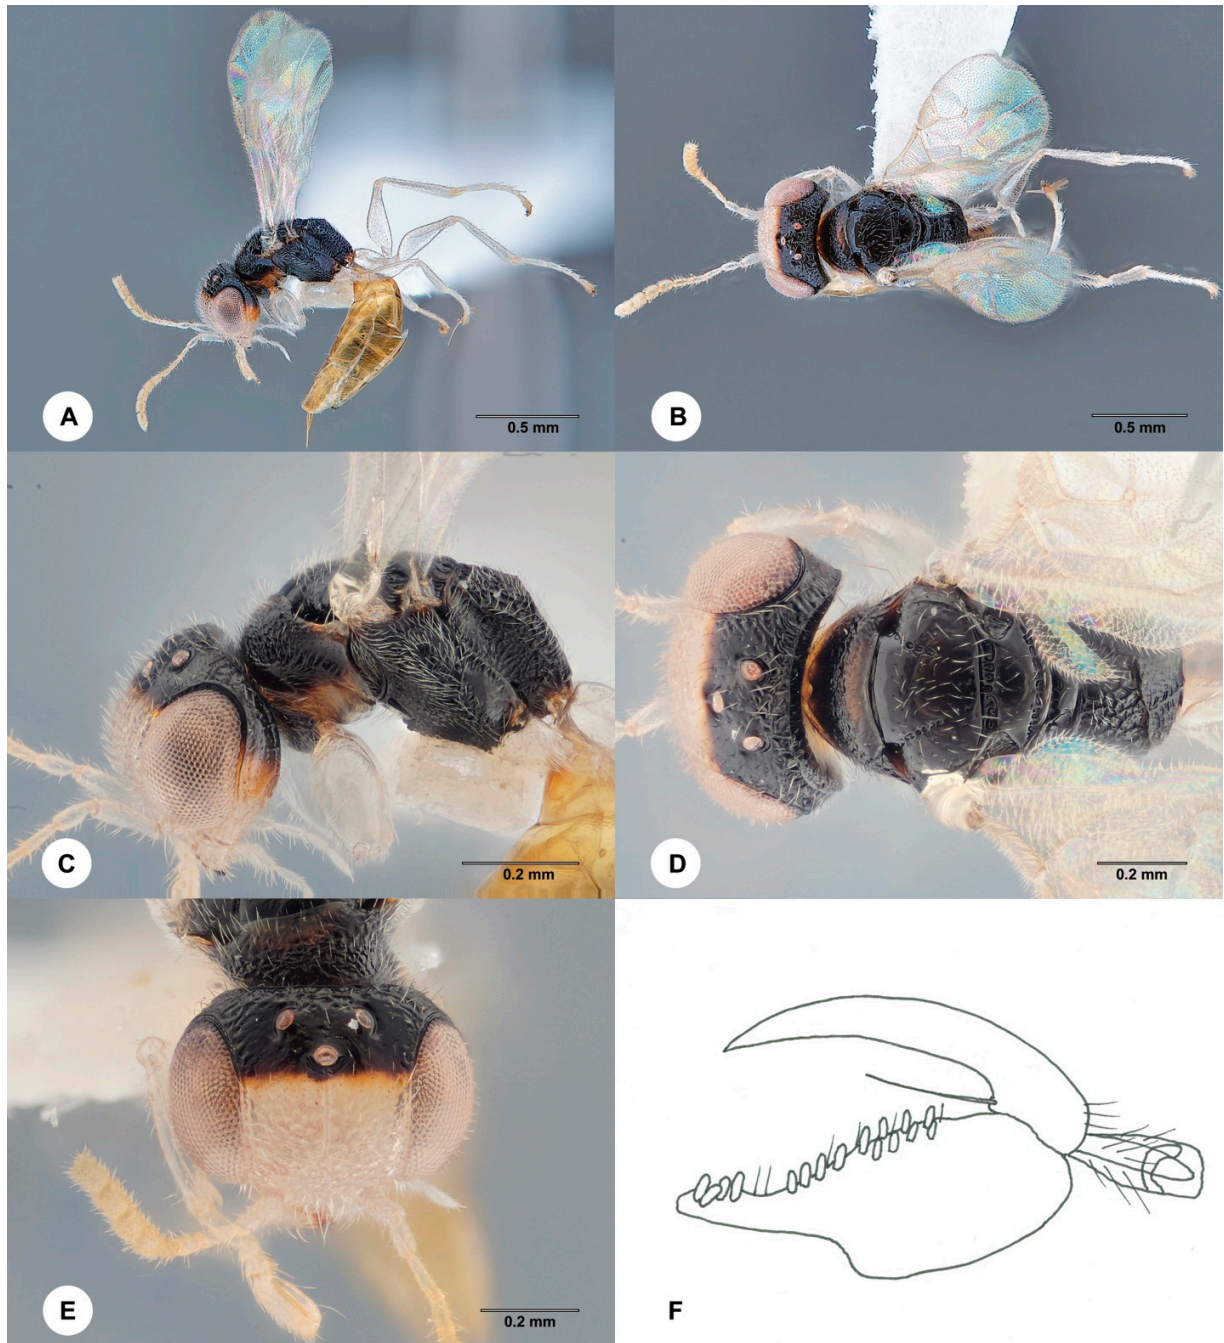

**Figure S19.** *Anteon nanlingense* Xu, Olmi & He, 2011, female (SCAU 3040433) (A) Habitus, lateral view (B) Habitus, dorsal view (C) Head and mesosoma, lateral view (D) Head and mesosoma, dorsal view (E) Head, anterior view (F) Chela.



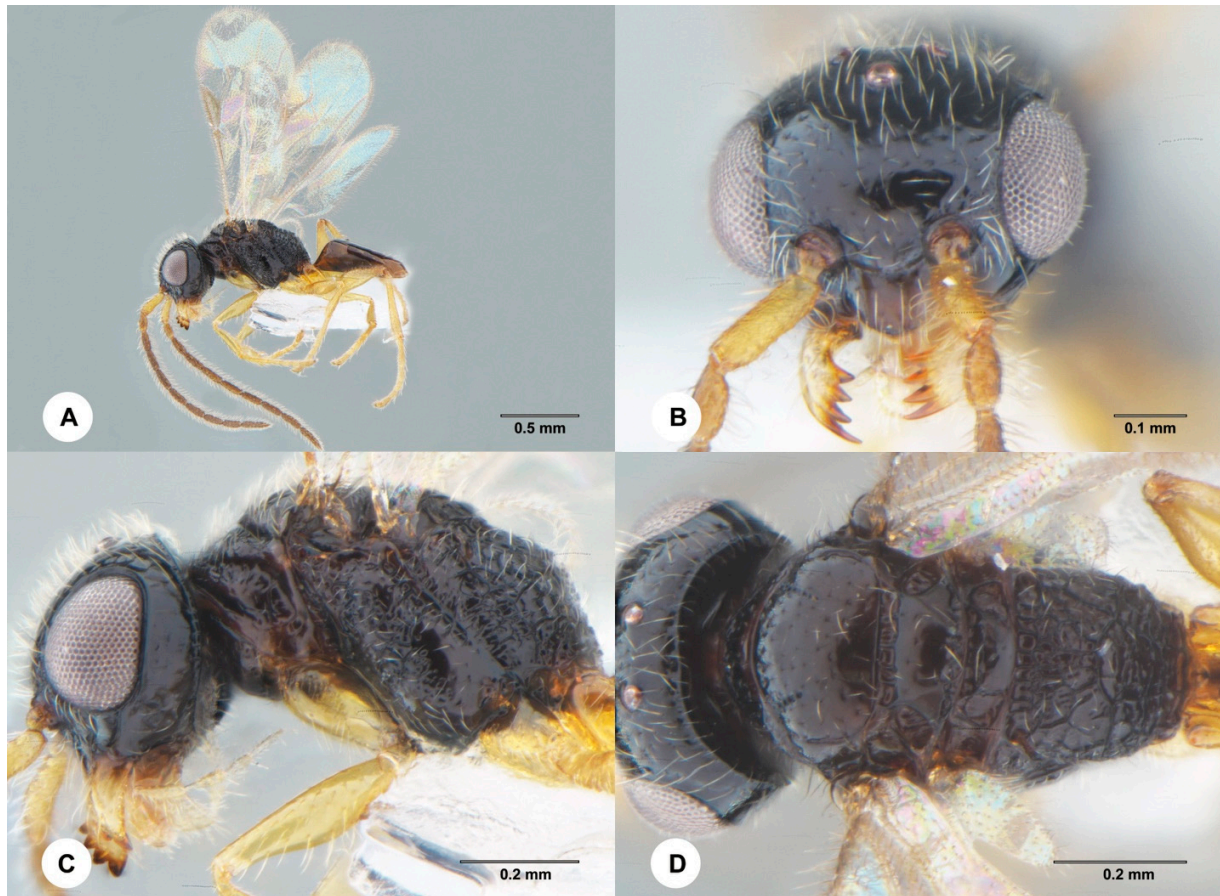

**Figure S20.** *Anteon nanlingense* Xu, Olmi & He, 2011, male (SCAU 3048821) (A) Habitus, lateral view (B) Head, dorsal view (C) Head and mesosoma, lateral view (D) Head and mesosoma, dorsal view.

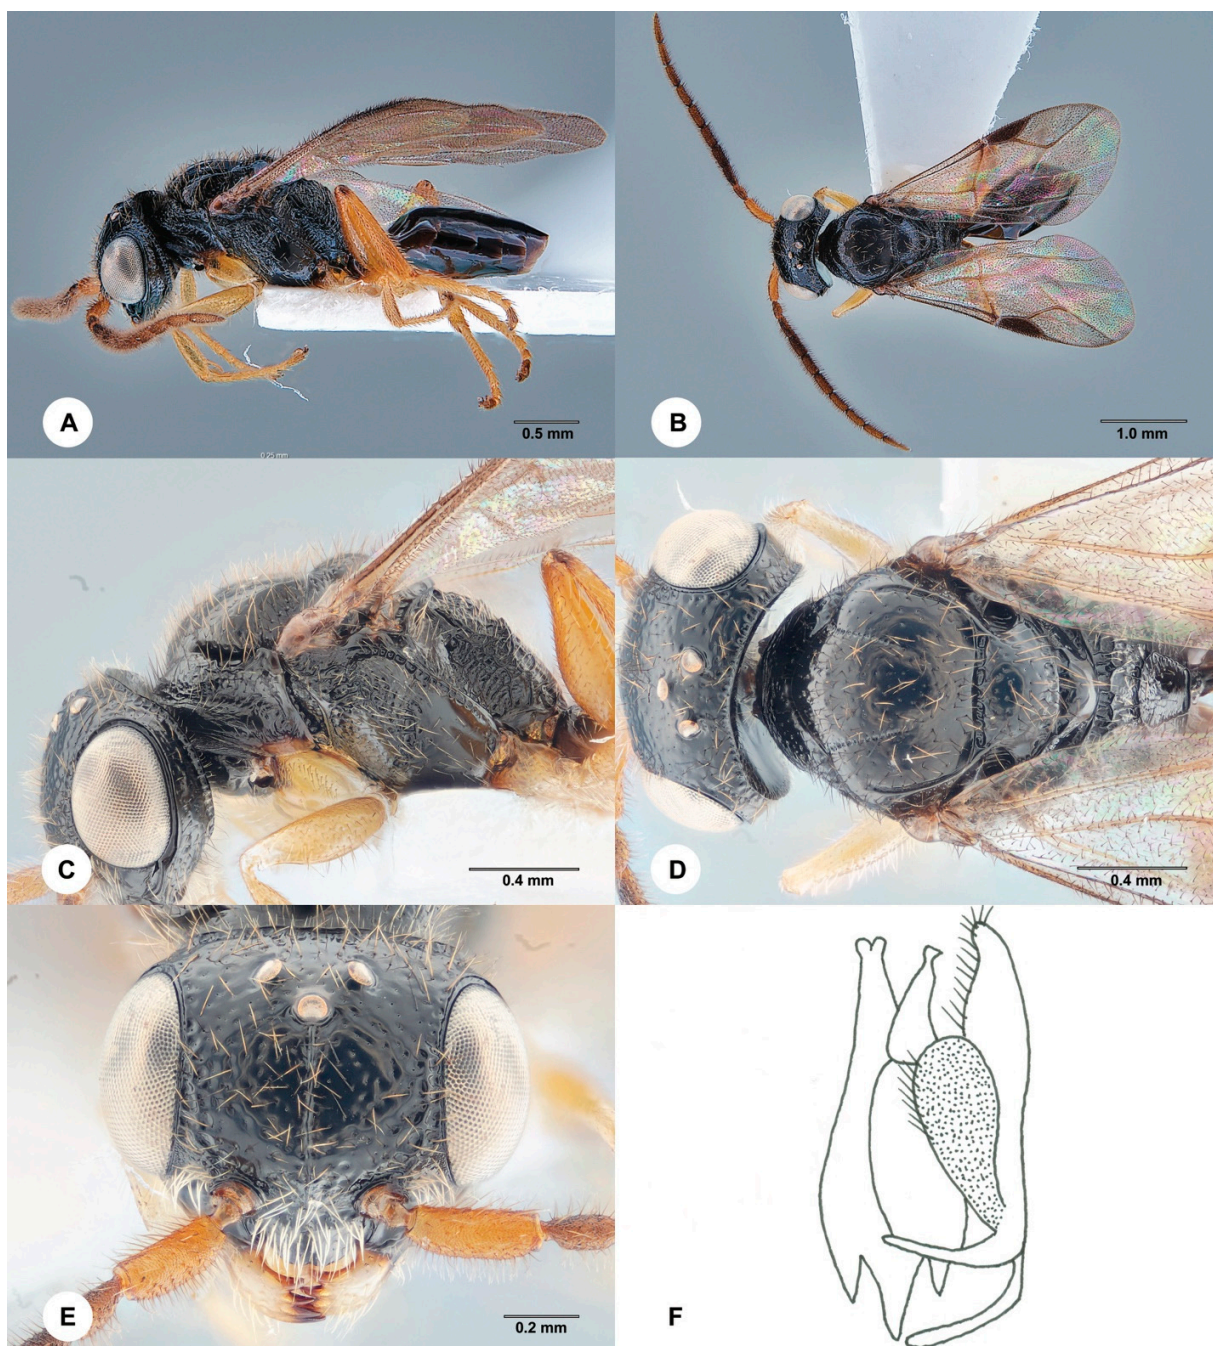

**Figure S21.** *Anteon pilosum* Xu, Olmi & He, 2010, male (SCAU 3040518) (A) Habitus, lateral view (B) Habitus, dorsal view (C) Head and mesosoma, lateral view (D) Head and mesosoma, dorsal view (E) Head, anterior view (F) Genitalia (left half removed).



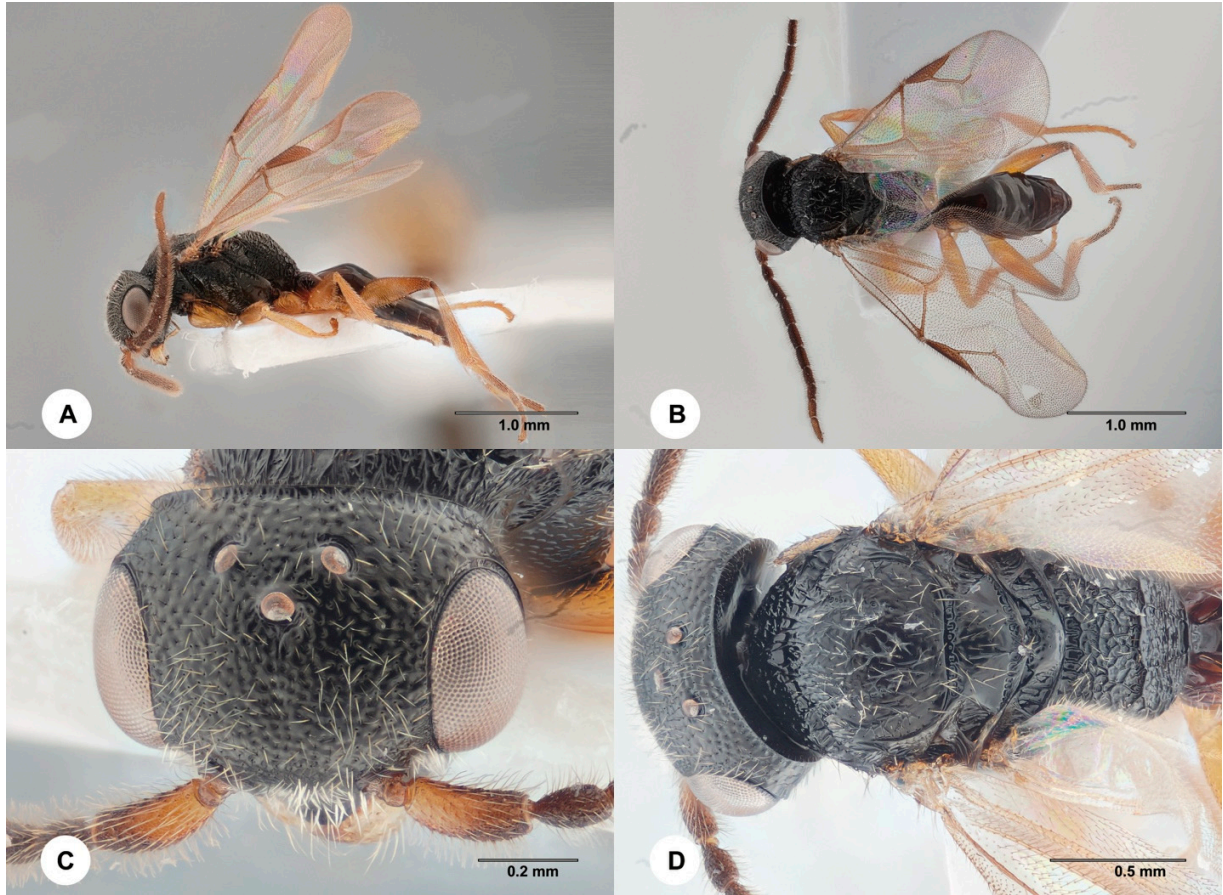

**Figure S22.** *Anteon priscum* Olmi, 1991, male (SCAU 3011723) (A) Habitus, lateral view (B) Habitus, dorsal view (C) Head, dorsal view (D) Head and mesosoma, dorsal view.

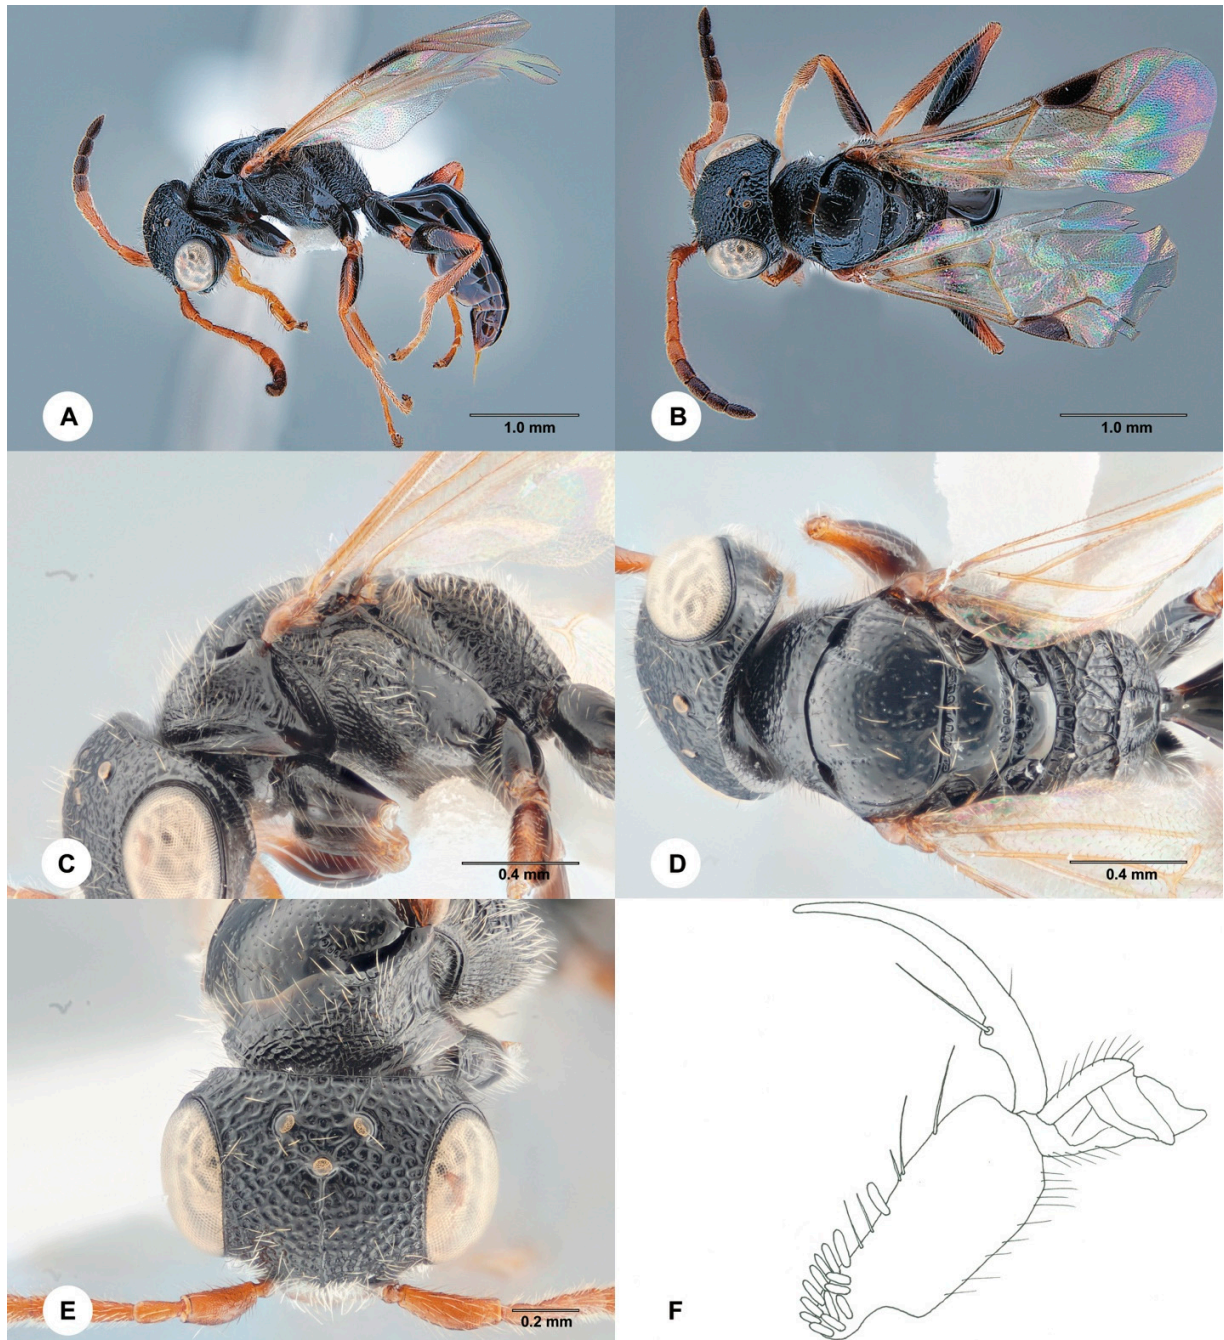

**Figure S23.** *Anteon pteromaculatum* Xu, Olmi, Guglielmino & Chen, 2012, female (SCAU 3040519) (A) Habitus, lateral view (B) Habitus, dorsal view (C) Head and mesosoma, lateral view (D) Head and mesosoma, dorsal view (E) Head, dorsal view (F) Chela.



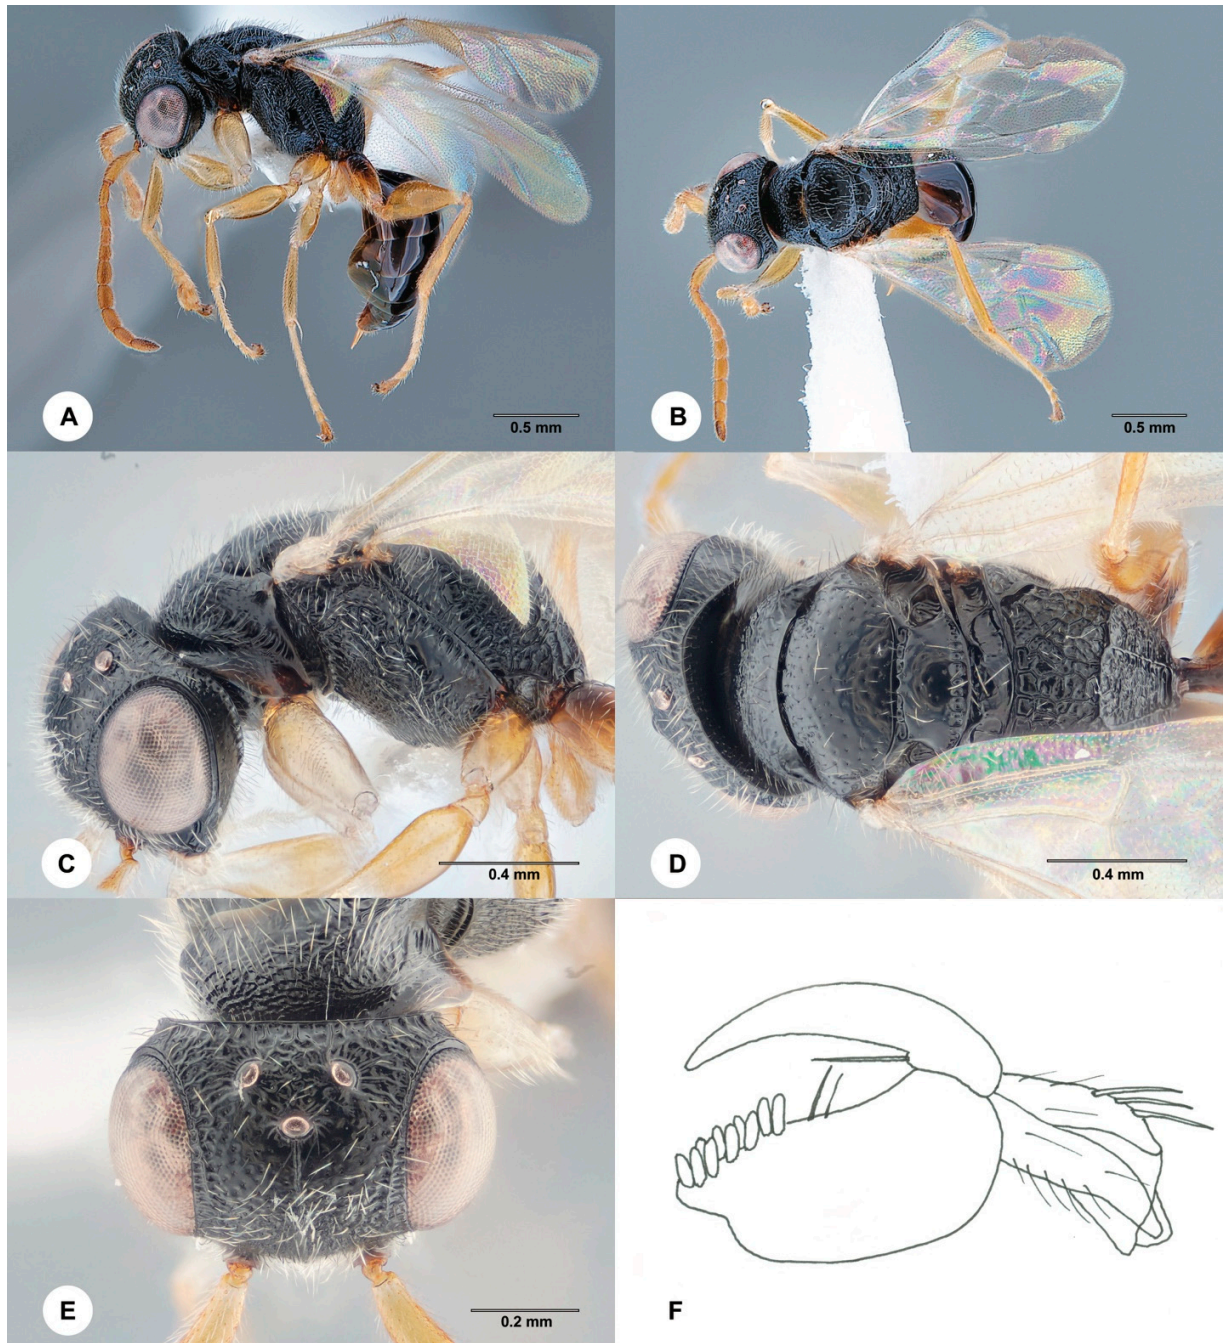

**Figure S24.** *Anteon tengchongense* Xu, He & Olmi, 1998, female (SCAU 3040523) (A) Habitus, lateral view (B) Habitus, dorsal view (C) Head and mesosoma, lateral view (D) Head and mesosoma, dorsal view (E) Head, dorsal view (F) Chela.



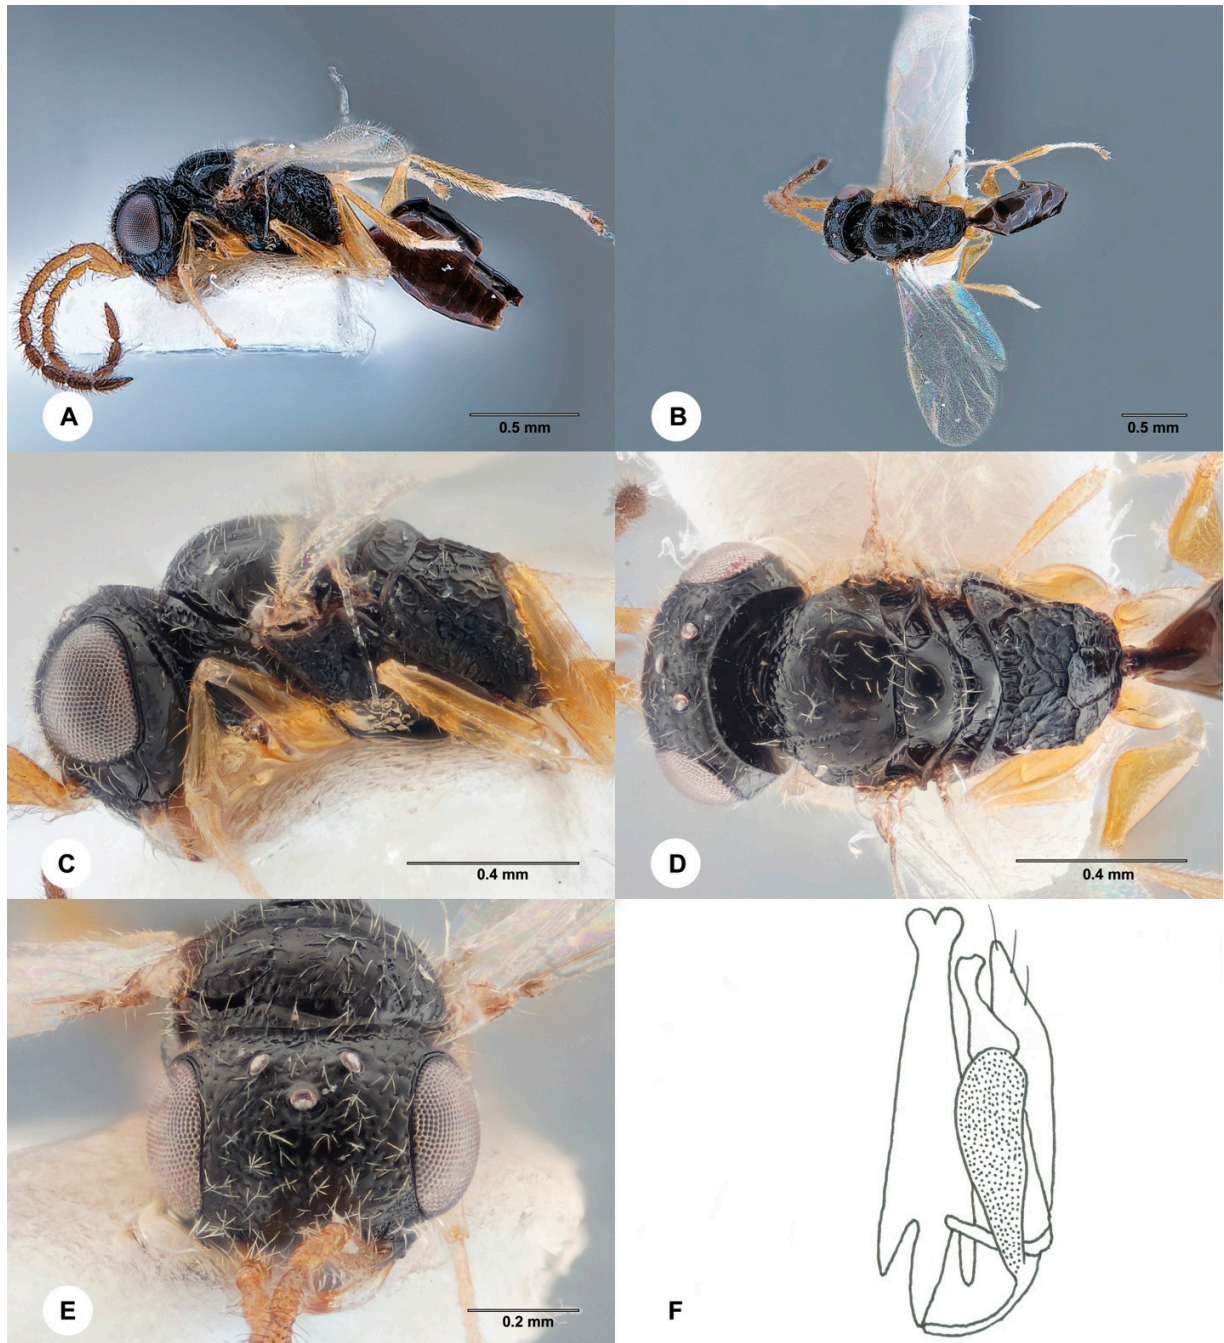

**Figure S25.** *Anteon yuani* Xu, He & Olmi 1998, male (SCAU 3011682) (A) Habitus, lateral view (B) Habitus, dorsal view (C) Head and mesosoma, lateral view (D) Head and mesosoma, dorsal view (E) Head, anterior view (F) Genitalia (left half removed).



**Table S1.** Details of sequenced specimens

| Code         | Figure No. | species                                       | Sex    | Collecting data                                                                                                                             |
|--------------|------------|-----------------------------------------------|--------|---------------------------------------------------------------------------------------------------------------------------------------------|
| SCAU 3040430 | Figure S1  | <i>Anteon abdounouri</i> Olmi, 1987           | female | CHINA: Shandong, Linyi, Lanling County, 34°51'N, 118°4'E, 5-15.viii.2014, MT, Xuejun Yang                                                   |
| SCAU 3011714 | Figure S2  | <i>Anteon achterbergi</i> Olmi, 1991          | female | CHINA: Shandong, Linyi, Lanling County, 34°51'N 118°4'E, 14-24.vii.2014, MT, Xuejun Yang                                                    |
| SCAU 3011677 | Figure S3  | <i>Anteon blanduscutum</i> Xu, He & Rui, 1996 | female | CHINA: Yunnan, Xishuangbanna, Menghai, Bulangshan Village, 21°44.981'N, 100°26.907'E, 1683 m, Area A2, grass, 15.viii.2018, Li Ma           |
| SCAU 3011678 | Figure 2   | <i>Anteon blanduscutum</i> Xu, He & Rui, 1996 | male   | CHINA: Yunnan, Xishuangbanna, Menghai, Bulangshan Village, 21°44.981'N, 100°26.907'E, 1683 m, Area A2, grass, 15.viii.2018, Li Ma           |
| SCAU 3011669 | Figure S4  | <i>Anteon borneanum</i> Olmi, 1984            | female | CHINA: Yunnan, Xishuangbanna, Menghai, Bulangshan Village, 21°44.745'N, 100°26.07'E, 1621m, Area D, near road, 20.vi-20.vii.2018, MT, Li Ma |
| SCAU 3011671 | Figure 3   | <i>Anteon clarichypeum</i> sp. n.             | female | CHINA: Yunnan, Xishuangbanna, Menghai, Bulangshan Village, 21°44.761'N, 100°25.959'E, 1595 m, Area D, forest, MT, 16.viii-14.ix.2018, Li Ma |
| SCAU 3011712 | Figure 5   | <i>Anteon claricolle</i> Kieffer, 1906        | male   | CHINA: Inner Mongolia, Wulan Aodu Experimental Station, 38°46'15"N, 108°46'41"E, 20-30.vi.2013, MT, Yongming Luo                            |
| SCAU 3040561 |            | <i>Anteon claricolle</i> Kieffer, 1906        | female | CHINA: Beijing, Yuanqing County, Zhangshanying Town, 40.50847°N, 115.78884°E, 807 m, 27.vi-4.vii.2012, MT, Jinyu Hu                         |
| SCAU 3040517 | Figure S5  | <i>Anteon confusum</i> Olmi, 1991             | female | CHINA: Shaanxi, Yang County, Huayang Town, 33.382156°N, 107.507905°E, 1154m, 26.v-26.vi.2017, MT, Haoyu Liu                                 |
| SCAU 3044058 | Figure S6  | <i>Anteon confusum</i> Olmi, 1991             | male   | CHINA: Yunnan, Xishuangbanna, Menghai, Bulangshan Village, 21°44.619'N, 100°26.721'E, 1692 m, Area C, forest, 28.v-28.vi.2019, MT, Li Ma    |
| SCAU 3011621 | Figure S7  | <i>Anteon exiguum</i> (Haupt, 1941)           | female | CHINA: Hebei, Xiaowutai National Nature Reserve, 39°52.048'N, 114°56.446'E, 1364 m, 13-20.viii.2012, MT, Haiming Zhang                      |
| SCAU 3040512 | Figure S8  | <i>Anteon fidum</i> Olmi, 1991                | male   | CHINA: Yunnan, Lanping Dist. Mt. Lasha, 26.324010°N, 99.275624°E, 2500 m, farm land, 20-30.vii.2018, MT, Jin-Ku Li                          |
| SCAU 3040522 | Figure S9  | <i>Anteon funiuense</i> Xu, He & Olmi, 2001   | female | CHINA: Shaanxi, Yang County Yishui Town, 33.441897°N, 107.361713°E, 901 m, 24.v-24.vi.2017, MT, Haoyu Liu                                   |
| SCAU 3044072 | Figure S10 | <i>Anteon henanense</i> Xu, He & Olmi, 2001   | female | CHINA: Yunnan, Lanping Dist., Mt. Lasha, 26.324161°N, 99.256617°E, 2700 m, sample 564, 11-26.viii.2019, MT2, A. Reshchikov et al.           |
| SCAU 3040511 | Figure S11 | <i>Anteon henanense</i> Xu, He & Olmi, 2001   | male   | CHINA: Yunnan, Lanping Dist. Mt. Lasha, 26.324010°N, 99.275624°E, 2500m, farm land, 20-30.vii.2018, MT, Jin-Ku Li                           |
| SCAU 3011713 | Figure S12 | <i>Anteon hilare</i> Olmi, 1984               | female | CHINA: Shandong, Linyi, Lanling County, 34°51'N, 118°4'E, 14-24.vii.2014, MT, Xuejun Yang                                                   |
| SCAU 3011676 | Figure S13 | <i>Anteon hirashimai</i> Olmi, 1993           | female | CHINA: Yunnan, Xishuangbanna, Menghai, Bulangshan Village, 21°44.619'N 100°26.721'E, 1692 m, Area C, forest, 21.vi-20.vii.2018, MT, Li Ma   |
| SCAU 3011738 | Figure 6   | <i>Anteon maguanense</i> sp. n.               | female | CHINA: Yunnan, Maguan Town, Muchang County, 22.91888°N, 104.162851°E, 1336 m, coniferous forest, vi.2017, MT, Li Ma                         |
| SCAU 3040514 | Figure 7   | <i>Anteon meifenganum</i> Olmi, 1991          | female | CHINA: Shaanxi, Yang County Huayang Town, 33.382156°N, 107.507905°E, 1154 m, 26.v-26.vi.2017, MT, Haoyu Liu                                 |
| SCAU 3040520 | Figure 8   | <i>Anteon meifenganum</i> Olmi, 1991          | male   | CHINA: Shaanxi, Yang County Huayang Town, 33.675537°N, 107.349632°E, 922 m, 12.iv-12.v.2017, MT, Haoyu Liu                                  |

|                 |            |                                                     |        |                                                                                                                                                    |
|-----------------|------------|-----------------------------------------------------|--------|----------------------------------------------------------------------------------------------------------------------------------------------------|
| SCAU<br>3040515 | Figure S14 | <i>Anteon mite</i> Olmi,<br>1996                    | male   | CHINA: Shaanxi, Yang County Huayang Town,<br>33.382156°N, 107.507905°E, 1154 m, 26.v-26.vi.2017, MT,<br>Haoyu Liu                                  |
| SCAU<br>3011661 | Figure S15 | <i>Anteon multicolor</i><br>Xu, He & Olmi,<br>1998  | female | CHINA: Yunnan, Xishuangbanna, Menghai, Bulangshan<br>Village, 21°45.037'N, 100°26.715'E, 1683 m, Area A, grass,<br>17.v-21.vi.2018, MT, Li Ma      |
| SCAU<br>3040571 |            | <i>Anteon multicolor</i><br>Xu, He & Olmi,<br>1998  | male   | CHINA: Yunnan, Xishuangbanna, Menghai, Bulangshan<br>Village, 21°44.521'N 100°26.647'E, 1646 m, Area C, grass,<br>17.v-21.vi.2018, MT, Li Ma       |
| SCAU<br>3040573 |            | <i>Anteon multicolor</i><br>Xu, He & Olmi,<br>1998  | male   | CHINA: Yunnan, Xishuangbanna, Menghai, Bulangshan<br>Village, 21°44.521'N 100°26.647'E, 1646 m, Area C, grass,<br>17.v-21.vi.2018, MT, Li Ma       |
| SCAU<br>3040574 |            | <i>Anteon multicolor</i><br>Xu, He & Olmi,<br>1998  | female | CHINA: Yunnan, Xishuangbanna, Menghai, Bulangshan<br>Village, 21°44.521'N 100°26.647'E, 1646 m, Area C, grass,<br>17.v-21.vi.2018, MT, Li Ma       |
| SCAU<br>3044011 | Figure S16 | <i>Anteon multicolor</i><br>Xu, He & Olmi,<br>1998  | male   | CHINA: Yunnan, Xishuangbanna, Menghai, Bulangshan<br>Village, 21°44.521'N 100°26.647'E, 1646 m, Area C, grass,<br>28.vi-19.vii.2019, MT, Li Ma     |
| SCAU<br>3044014 |            | <i>Anteon multicolor</i><br>Xu, He & Olmi,<br>1998  | female | CHINA: Yunnan, Xishuangbanna, Menghai, Bulangshan<br>Village, 21°44.521'N 100°26.647'E, 1646 m, Area C, grass,<br>28.vi-19.vii.2019, MT, Li Ma     |
| SCAU<br>3044065 |            | <i>Anteon multicolor</i><br>Xu, He & Olmi,<br>1998  | male   | CHINA: Guangdong, Guangzhou, South China Botanical<br>Garden, Pugang, 23°11'25.82"N, 113°21'47.01"E, 7.vii-<br>7.viii.2019, MT7, Shixiao Luo       |
| SCAU<br>3044074 |            | <i>Anteon multicolor</i><br>Xu, He & Olmi,<br>1998  | female | CHINA: Yunnan, Lanping Dist., Mt. Lasha, 26.324161°N,<br>99.256617°E, 2700 m, sample 564 11-26.viii.2019, MT2, A.<br>Reshchikov et al.             |
| SCAU<br>3044114 |            | <i>Anteon multicolor</i><br>Xu, He & Olmi,<br>1998  | male   | CHINA:Yunnan, Lanping Dist. Mt. Lasha, 26.324161°N,<br>99.256617°E, 2700m, boskage, 10-20.vii.2018, MT, Jin-Ku Li                                  |
| SCAU<br>3048997 |            | <i>Anteon multicolor</i><br>Xu, He & Olmi,<br>1998  | male   | CHINA: Yunnan, Mt. Gaoligong, 25°23'59.6"N, 98°42'26.6"E,<br>1951m, 1-15.vi.2020, MT, Yi Lang                                                      |
| SCAU<br>3040524 | Figure S17 | <i>Anteon munitum</i><br>Olmi, 1984                 | male   | CHINA: Shaanxi, Yang County, Yishui Town, 33.441897°N,<br>107.361713°E, 901 m, MT, 24.v-24.vi.2017, MT, Haoyu Liu                                  |
| SCAU<br>3040521 | Figure S18 | <i>Anteon nadyense</i><br>Olmi 1987                 | female | CHINA: Shaanxi, Yang County, Yishui Town, 33.441897°N,<br>107.361713°E, 901 m, MT, 24.v-24.vi.2017, MT, Haoyu Liu                                  |
| SCAU<br>3040433 | Figure S19 | <i>Anteon nanlingense</i><br>Xu, Olmi & He,<br>2011 | female | THAILAND: Mae Hong Son Prov., Pai, 19°22'4.4"N,<br>98°30'16"E, 745m, 1.ii-26.iii.2016, MT, A. Reshchikov                                           |
| SCAU<br>3048821 | Figure S20 | <i>Anteon nanlingense</i><br>Xu, Olmi & He,<br>2011 | male   | CHINA: Guangdong, Shenzhen, Huaqiao Cheng, wet land,<br>22.533217°N, 113.968771°E, 31.iii-29.iv.2020, MT, Longlong<br>Chen                         |
| SCAU<br>3011658 | Figure 9   | <i>Anteon parafidum</i><br>sp. n.                   | female | CHINA: Yunnan, Xishuangbanna, Menghai, Bulangshan<br>Village, 21°45.037'N, 100°26.715'E, 1683 m, Area A, grass,<br>17.v-21.vi.2018, MT, Li Ma      |
| SCAU<br>3011662 | Figure 10  | <i>Anteon parafidum</i><br>sp. n.                   | male   | CHINA: Yunnan, Xishuangbanna, Menghai, Bulangshan<br>Village, 21°45.037'N, 100°26.715'E, 1683 m, Area A, grass,<br>17.v-21.vi.2018, MT, Li Ma      |
| SCAU<br>3040566 |            | <i>Anteon parafidum</i><br>sp. n.                   | female | CHINA: Yunnan, Xishuangbanna, Menghai, Bulangshan<br>Village, 21°44.981'N 100°26.907'E, 1683 m, Area A2, grass,<br>15.viii.2018, MT, Li Ma         |
| SCAU<br>3040567 |            | <i>Anteon parafidum</i><br>sp. n.                   | male   | CHINA: Yunnan, Xishuangbanna, Menghai, Bulangshan<br>Village, 21°44.981'N 100°26.907'E, 1683 m, Area A2, grass,<br>15.viii.2018, MT, Li Ma         |
| SCAU<br>3044018 |            | <i>Anteon parafidum</i><br>sp. n.                   | male   | CHINA: Yunnan, Xishuangbanna, Menghai, Bulangshan Village,<br>21°45.037'N, 100°26.715'E, 1683 m, Area A1, grass, 21.viii-<br>20.ix.2019, MT, Li Ma |



|                 |            |                                                                              |        |                                                                                                                                                     |
|-----------------|------------|------------------------------------------------------------------------------|--------|-----------------------------------------------------------------------------------------------------------------------------------------------------|
| SCAU<br>3044026 |            | <i>Anteon parafidum</i><br>sp. n.                                            | female | CHINA: Yunnan, Xishuangbanna, Menghai, Bulangshan Village,<br>21°45.037'N, 100°26.715'E, 1683 m, Area A1, grass, 21.viii-<br>20.ix.2019, MT, Li Ma  |
| SCAU<br>3044033 |            | <i>Anteon parafidum</i><br>sp. n.                                            | female | CHINA: Yunnan, Xishuangbanna, Menghai, Bulangshan Village,<br>21°44.981'N, 100°26.907'E, 1683 m, Area A2, grass, 20.iv-<br>28.v.2019, MT, Li Ma     |
| SCAU<br>3044066 |            | <i>Anteon parafidum</i><br>sp. n.                                            | male   | CHINA: Yunnan, Xishuangbanna, Menghai, Bulangshan Village,<br>21°45.037'N, 100°26.715'E, 1683 m, Area A1, grass, 28.v-<br>28.vi.2019, MT, Li Ma     |
| SCAU<br>3044088 |            | <i>Anteon parafidum</i><br>sp. n.                                            | male   | CHINA: Yunnan, Xishuangbanna, Menghai, Bulangshan Village,<br>21°45.037'N, 100°26.715'E, 1683 m, Area A1, grass, 20.vii-<br>21.viii.2019, MT, Li Ma |
| SCAU<br>3044089 |            | <i>Anteon parafidum</i><br>sp. n.                                            | female | CHINA: Yunnan, Xishuangbanna, Menghai, Bulangshan Village,<br>21°45.037'N, 100°26.715'E, 1683 m, Area A1, grass, 20.vii-<br>21.viii.2019, MT, Li Ma |
| SCAU<br>3040518 | Figure S21 | <i>Anteon pilosum</i> Xu,<br>Olmi & He, 2010                                 | male   | CHINA: Shaanxi, Yang County, Huayang Town,<br>33.382156°N, 107.507905°E, 1154 m, 26.v-26.vi.2017, MT,<br>Haoyu Liu                                  |
| SCAU<br>3011631 | Figure 11  | <i>Anteon priscum</i><br>Olmi, 1991                                          | female | CHINA: Jiangsu, Nanjing, Xianlin, Mt. Duoshan, 32°6'51"N,<br>118°54'43"E, 30.iv-7.v.2012, MT, Jie Zhao                                              |
| SCAU<br>3011723 | Figure S22 | <i>Anteon priscum</i><br>Olmi, 1991                                          | male   | CHINA: Jiangsu, Nanjing, Xianlin, Mt. Duoshan, 32°6'51"N<br>118°54'43"E, 9-15.iv.2012, MT, Jie Zhao                                                 |
| SCAU<br>3040519 | Figure S23 | <i>Anteon<br/>pteromaculatum</i><br>Xu, Olmi,<br>Guglielmino &<br>Chen, 2012 | female | CHINA: Shaanxi, Yang County, Huayang Town,<br>33.675537°N, 107.349632°E, 922 m, 12.iv-12.v.2017, MT,<br>Haoyu Liu                                   |
| SCAU<br>3040516 | Figure 12  | <i>Anteon<br/>shaanxianum</i> sp. n.                                         | male   | CHINA: Shaanxi, Yang County, Huayang Town,<br>33.382156°N, 107.507905°E, 1154 m, 26.v-26.vi.2017, MT,<br>Haoyu Liu                                  |
| SCAU<br>3011688 | Figure 13  | <i>Anteon<br/>shandonganum</i> sp.<br>n.                                     | female | CHINA: Shandong, Shanghe County, 37°16'4"N,<br>117°9'10"E, 23-29.vi.2018, MT3, Jiahe Yan                                                            |
| SCAU<br>3040523 | Figure S24 | <i>Anteon<br/>tengchongense</i> Xu,<br>He & Olmi, 1998                       | female | CHINA: Shaanxi, Yang County, Yishui Town, 33.441897°N<br>107.361713°E, 901 m, 24.v-24.vi.2017, MT, Haoyu Liu                                        |
| SCAU<br>3011682 | Figure S25 | <i>Anteon yuani</i> Xu,<br>He & Olmi, 1998                                   | male   | CHINA: Guangdong, Guangzhou, University Town,<br>23°2'55"N 113°23'12"E, forest, 16-26.x.2018, MT, Huayan<br>Chen                                    |

**Table S2.** Genetic distance of *COI* within *Anteon* species under K2P model

| Species                    | Distance(%) |
|----------------------------|-------------|
| <i>Anteon abdunnouri</i>   | NA          |
| <i>Anteon achterbergi</i>  | NA          |
| <i>Anteon blanduscutum</i> | 1.6         |
| <i>Anteon borneanum</i>    | NA          |
| <i>Anteon clariclypeum</i> | NA          |
| <i>Anteon claricolle</i>   | 0.8–1.8     |
| <i>Anteon collare</i>      | NA          |
| <i>Anteon confusum</i>     | 2           |
| <i>Anteon ephippiger</i>   | NA          |
| <i>Anteon exiguum</i>      | 1.4         |
| <i>Anteon fulviventre</i>  | NA          |
| <i>Anteon fidum</i>        | NA          |
| <i>Anteon funiuense</i>    | NA          |
| <i>Anteon gaullei</i>      | NA          |
| <i>Anteon henanense</i>    | 0           |
| <i>Anteon hilare</i>       | NA          |
| <i>Anteon hirashimai</i>   | NA          |
| <i>Anteon maguanense</i>   | NA          |
| <i>Anteon meifenganum</i>  | 0           |
| <i>Anteon mite</i>         | NA          |
| <i>Anteon multicolor</i>   | 0.8–0.5     |
| <i>Anteon munitum</i>      | NA          |
| <i>Anteon naduense</i>     | NA          |
| <i>Anteon nanlingense</i>  | 3           |
| <i>Anteon parafidum</i>    | 0.8–0.3     |
| <i>Anteon pilosum</i>      | NA          |



---

|                              |     |
|------------------------------|-----|
| <i>Anteon priscum</i>        | 0.6 |
| <i>Anteon pteromaculatum</i> | NA  |
| <i>Anteon shaanxianum</i>    | NA  |
| <i>Anteon shandonganum</i>   | NA  |
| <i>Anteon tengchongense</i>  | NA  |
| <i>Anteon yuani</i>          | NA  |

---

|    |                            | 1 | 2   | 3         | 4       | 5         | 6         | 7         | 8         | 9       | 10        | 11        | 12        | 13        | 14        | 15        | 16        | 17        | 18        | 19        | 20        | 21        | 22        | 23        | 24        | 25        | 26        | 27        | 28        | 29        | 30        | 31        | 32        |      |
|----|----------------------------|---|-----|-----------|---------|-----------|-----------|-----------|-----------|---------|-----------|-----------|-----------|-----------|-----------|-----------|-----------|-----------|-----------|-----------|-----------|-----------|-----------|-----------|-----------|-----------|-----------|-----------|-----------|-----------|-----------|-----------|-----------|------|
| 1  | <i>Anteon abdounouri</i>   |   | 5.7 | 19.4–19.9 | 15.5    | 20        | 15.5–16.1 | 16.1      | 18–18.8   | 16.9    | 15.7–15.8 | 18.5      | 16.8      | 16.2      | 18.5      | 18.8–18.9 | 15.7      | 16.5      | 20.7      | 16.6–16.7 | 15.8      | 17–17.5   | 17.6      | 17.8      | 15.7–16.5 | 15.8–16.4 | 19.6      | 16.1–16.8 | 18.2      | 17.1      | 14        | 15.5      | 15        |      |
| 2  | <i>Anteon achterbergi</i>  |   |     | 16.1–16.5 | 15.2    | 16.5      | 3.1–4.6   | 9.1       | 12.1–12.6 | 9.4     | 11–11.3   | 10.8      | 12.7      | 13.8      | 12.3      | 17.1–17.2 | 17.7      | 15.2      | 17.9      | 14.5–14.6 | 15.2      | 9.6–10.1  | 13.3      | 13.3      | 14.1–14.3 | 11.4–12.1 | 17.7      | 11–11.9   | 15.3      | 10.4      | 8.8       | 4.6       | 12.1      |      |
| 3  | <i>Anteon blandiscutum</i> |   |     |           | 17.8–18 | 19.4–19.8 | 17.2–18.1 | 16.7–17   | 16.7–17.6 | 17–17.2 | 17.3–18.1 | 17–17.5   | 17.8–18.1 | 13.1–13.2 | 18.3–18.8 | 19.2–20.2 | 20.7–21.1 | 17.9–18.5 | 17.6–17.7 | 18.9–19.3 | 17.6–18   | 16.4–17.8 | 17.8–18.2 | 19.3–19.8 | 19–19.6   | 16.8–17.7 | 19.6–19.8 | 15.2–16.4 | 19.8–19.9 | 15.8–16.3 | 16.5–16.7 | 17.6–17.8 | 14.9–15.3 |      |
| 4  | <i>Anteon borneanum</i>    |   |     |           |         | 17.1      | 16.4–17   | 14.9      | 14.6–14.8 | 15.7    | 15.9–16.1 | 16.8      | 14.7      | 15.7      | 17.7      | 16.4–16.8 | 16.4      | 14.7      | 19.9      | 14.5–14.6 | 15.5      | 16.5–16.9 | 15.7      | 18.6      | 16.1–16.4 | 14.6–15.4 | 15.8      | 15.7–16.4 | 15.2      | 15.2      | 16.3      | 15.1      | 13.7      |      |
| 5  | <i>Anteon clariclypeum</i> |   |     |           |         |           | 16.8–17.7 | 15.2      | 16.9–17.6 | 17.2    | 17.3–18   | 17.5      | 16.3      | 15.5      | 18.1      | 19.4–19.6 | 19.3      | 18.9      | 18.5      | 16.7–16.8 | 17.9      | 17–17.2   | 15.4      | 17.3      | 17.1–17.3 | 15.9–16.7 | 18.9      | 17.3–18   | 19.1      | 16.9      | 16.4      | 16.4      | 15.3      |      |
| 6  | <i>Anteon claricolle</i>   |   |     |           |         |           |           | 10.3–10.4 | 13.7–14.7 | 9.8–10  | 11.2–11.7 | 12.3–12.5 | 13.2–13.4 | 13.9–14.5 | 12.5–12.9 | 16.9–17.2 | 17.7–18.1 | 16.7      | 19.1–19.3 | 15.5–16.1 | 16–16.3   | 10.2–11.4 | 14.5–15.1 | 13.6–15   | 14.6–15.5 | 11.6–12.5 | 18.3–18.4 | 11.9–13.1 | 16–17     | 11.3–11.5 | 10.2–10.5 | 15.4–15.8 | 12.6–13.1 |      |
| 7  | <i>Anteon collare</i>      |   |     |           |         |           |           |           | 13.5–14.1 | 4.1     | 11.1      | 8.7       | 11        | 12.3      | 9.1       | 17.8–18.1 | 17.4      | 15.4      | 18.3      | 15.2      | 13.9      | 10–10.2   | 13.4      | 13.4      | 13.4–13.7 | 11.1–11.6 | 16.4      | 10.4–11.1 | 15.6      | 10.2      | 8.7       | 4.3       | 10.8      |      |
| 8  | <i>Anteon confusum</i>     |   |     |           |         |           |           |           |           |         |           | 14.5–15.1 | 15.1–15.7 | 14.6–14.7 | 15.3      | 13.1–13.7 | 5.6–6.3   | 18.3–18.9 | 16.3–16.8 | 15.7–15.8 | 17.7–18.6 | 16.6–17   | 16.2      | 13.3–14.6 | 13.5–14.3 | 17.1–17.4 | 12.4–13.1 | 14.8–15.1 | 17.9–18.1 | 12.8–13.9 | 14.6–14.1 | 13.2–14.8 | 14.7–14.5 | 14.3 |
| 9  | <i>Anteon ephippiger</i>   |   |     |           |         |           |           |           |           |         | 11.1–11.4 | 8.5       | 11.6      | 13.1      | 9.9       | 18.1–18.4 | 18.3      | 16.4      | 19        | 16.4      | 15.2      | 10.7–15.2 | 15.2      | 14.3      | 14.2–14.3 | 11.6–12.4 | 16.9      | 10.9–11.8 | 15.4      | 11        | 9.7       | 15.2      | 11.7      |      |
| 10 | <i>Anteon exiguum</i>      |   |     |           |         |           |           |           |           |         |           | 13.2      | 7.5       | 14.3–14.5 | 14.2–14.5 | 19.4–20.1 | 16.8–16.9 | 16.6–16.7 | 18–18.4   | 15.5–15.8 | 15.1      | 11.7–12.6 | 15.4      | 14.5–14.8 | 12.6–13.7 | 7.1–7.7   | 17.3–17.7 | 11.8–12.6 | 16.8      | 12.9–13.2 | 11.1–11.4 | 14.9–15.8 | 11.9–12.2 |      |
| 11 | <i>Anteon fulviventre</i>  |   |     |           |         |           |           |           |           |         |           |           | 14.3      | 14.2      | 12.3      | 18.6–18.7 | 18.9      | 17.2      | 18.4      | 15.7      | 17.2      | 10.5–10.7 | 14.3      | 14.7      | 16.9–17.2 | 14.2–14.6 | 17.5      | 13.4–14.2 | 16.2      | 11.6      | 11.1      | 14.2      | 12.9      |      |
| 12 | <i>Anteon fidum</i>        |   |     |           |         |           |           |           |           |         |           |           |           | 12.9      | 15        | 18.4–18.9 | 15.9      |           |           |           |           |           |           |           |           |           |           |           |           |           |           |           |           |      |
